# Supplementary material for: In Vitro Anti-Toxoplasma gondii and Antimicrobial Activity of Amides Derived from Cinnamic Acid
Source: PubMed Central journal article supplement (PMC6017938; doi:10.3390/molecules23040774), 2018-03-28
Supplement: molecules-23-00774-s001.pdf [file molecules-23-00774-s001.pdf]

# In vitro Anti-*Toxoplasma gondii* and Antimicrobial Activity of Amides Derivated From Cinnamic Acid

Graziela Rangel Silveira<sup>1,\*</sup>, Karoline Azerêdo Campelo<sup>1</sup>, Gleice Rangel Silveira Lima<sup>1</sup>, Lais Pessanha Carvalho<sup>2</sup>, Solange Silva Samarão<sup>3</sup>, Olney Vieira-da-Motta<sup>3</sup>, Leda Mathias<sup>1</sup>, Carlos Roberto Ribeiro Matos<sup>1</sup>, Ivo José Curcino Vieira<sup>1</sup>, Edesio José Tenório de Melo<sup>2</sup>, Edmilson José Maria<sup>1</sup>

<sup>1</sup> Laboratório de Ciências Químicas, Centro de Ciências e Tecnologia, Universidade Estadual do Norte Fluminense-Darcy Ribeiro, Av. Alberto Lamego, 2000 - Parque Califórnia, Campos dos Goytacazes/RJ, 28013-602, Brasil; graziela\_sil@hotmail.com (G. R. S.); karolcampelo16@yahoo.com.br (K. A. C.); gleice.sil@hotmail.com (G. R. S. L.); leddam8@gmail.com (L. M.); matos@uenf.br (C. R. R. M.); curcino@uenf.br (I. J. C. V.); edmilson\_maria@yahoo.com.br (E. J. M.).

<sup>2</sup> Laboratório de Biologia Celular e Tecidual, Centro de Biociências e Biotecnologia, Universidade Estadual do Norte Fluminense-Darcy Ribeiro, Av. Alberto Lamego, 2000 - Parque Califórnia, Campos dos Goytacazes/RJ, 28013-602, Brasil; lais\_pessanha@hotmail.com (L. P. C.); ejtm1202@gmail.com (E. J. T. M.).

<sup>3</sup> Laboratório de Sanidade Animal, Centro de Ciências e Tecnologias Agropecuárias, Universidade Estadual do Norte Fluminense-Darcy Ribeiro, Av. Alberto Lamego, 2000 - Parque Califórnia, Campos dos Goytacazes/RJ, 28013-602, Brasil; solangesamarao@gmail.com (S. S. S.); olney.motta@gmail.com (O. V.dM.).

\* Corresponding author: graziela\_sil@hotmail.com; Tel.: +55-022-2728-6167

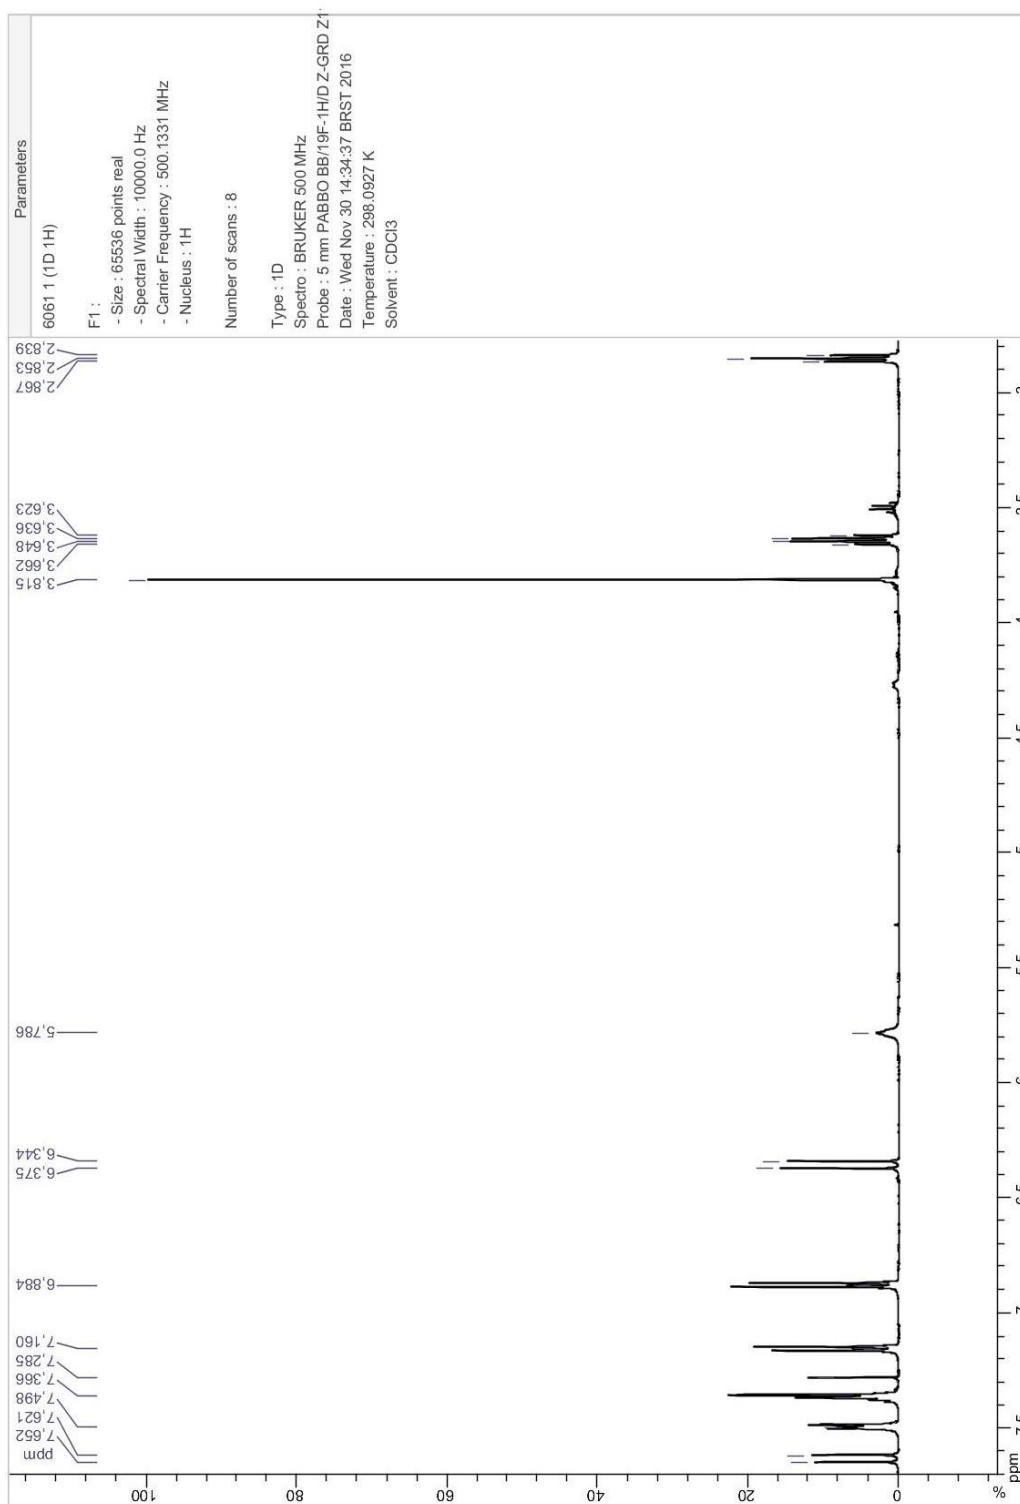

**Figure S1.** <sup>1</sup>H NMR spectrum of compound **1** (CDCl<sub>3</sub>, 500 MHz).

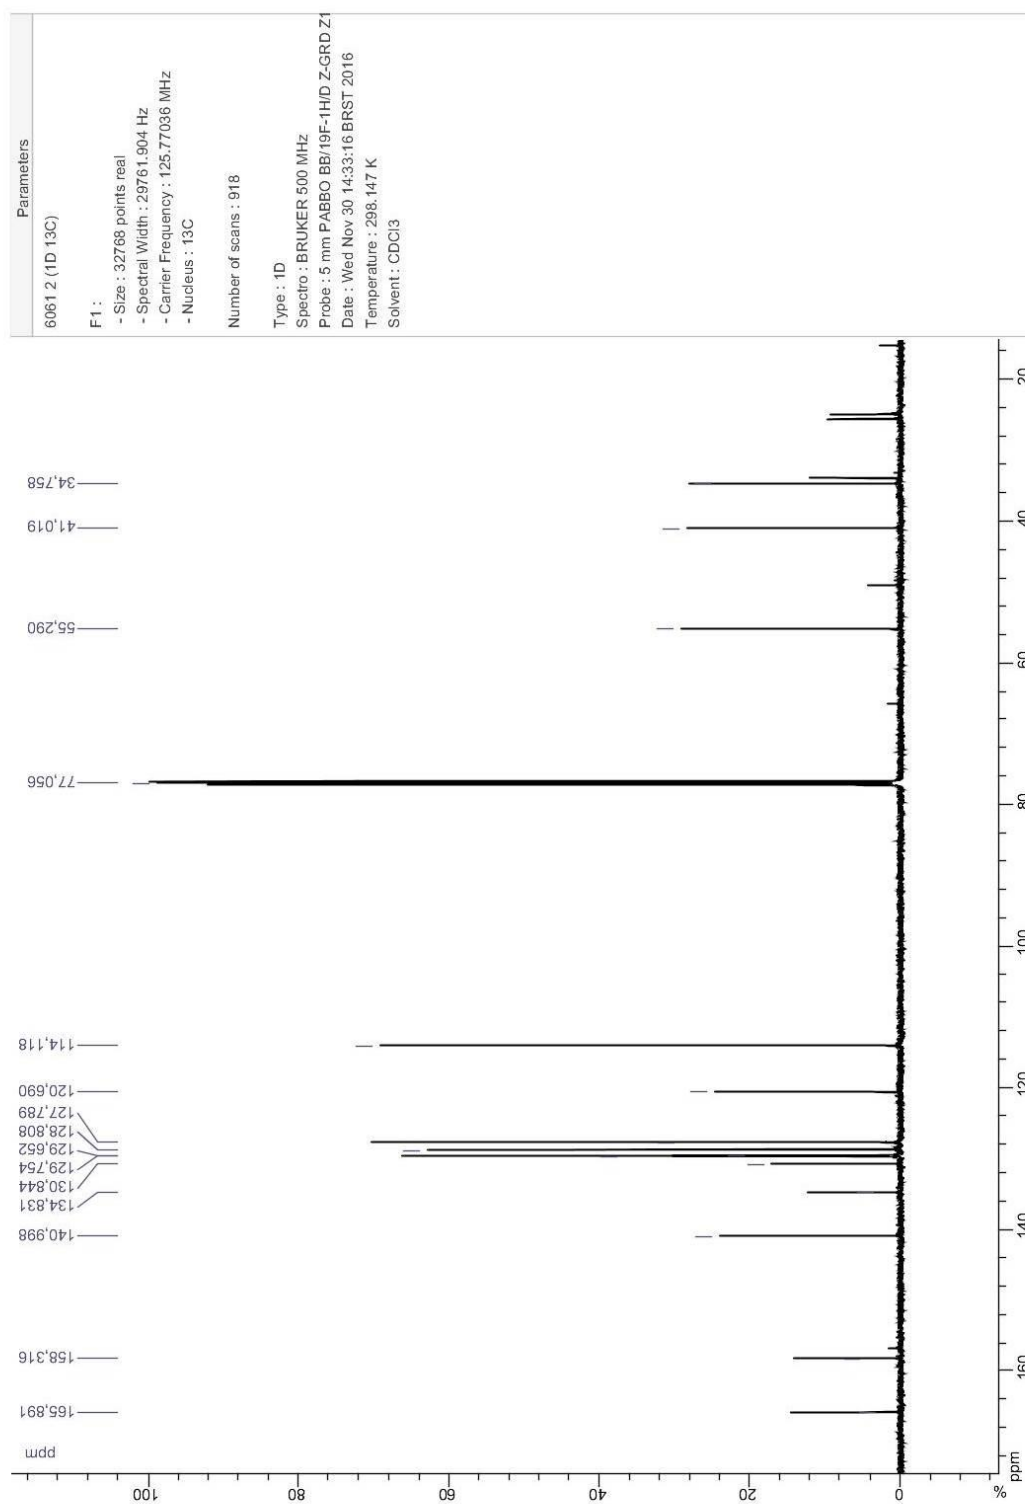

**Figure S2.**  $^{13}\text{C}$  NMR spectrum of compound 1 ( $\text{CDCl}_3$ , 125 MHz).

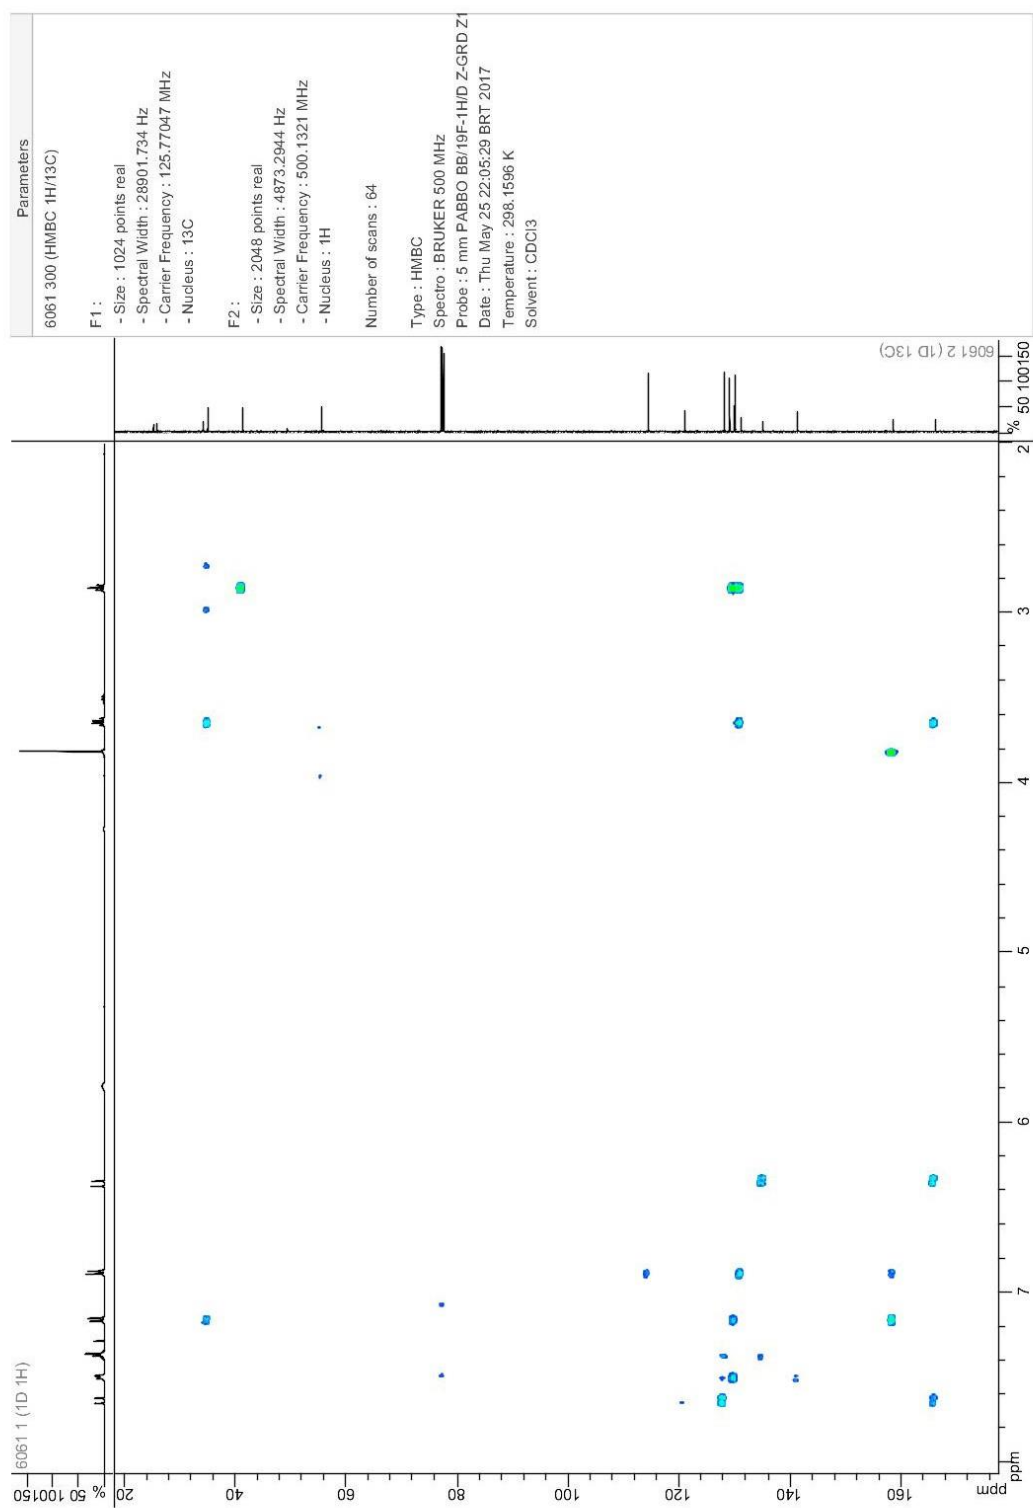

Figure S3. HMBC spectrum of compound 1 ( $\text{CDCl}_3$ , 500 MHz).

001 HSQC.ESP

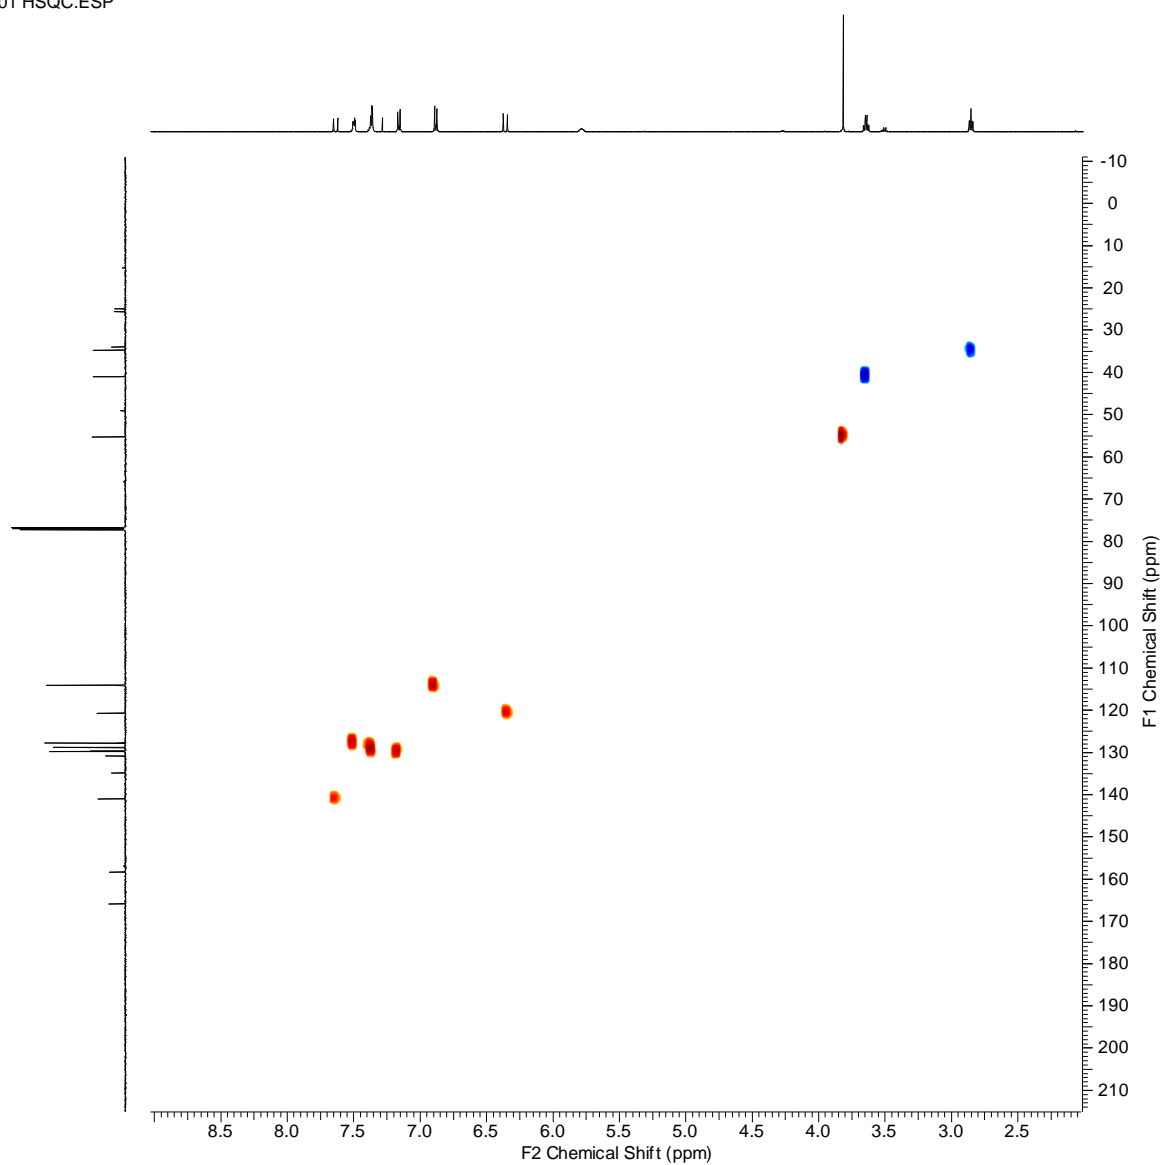

**Figure S4.** HSQC spectrum of compound **1** (CDCl<sub>3</sub>, 500 MHz).

Abundance

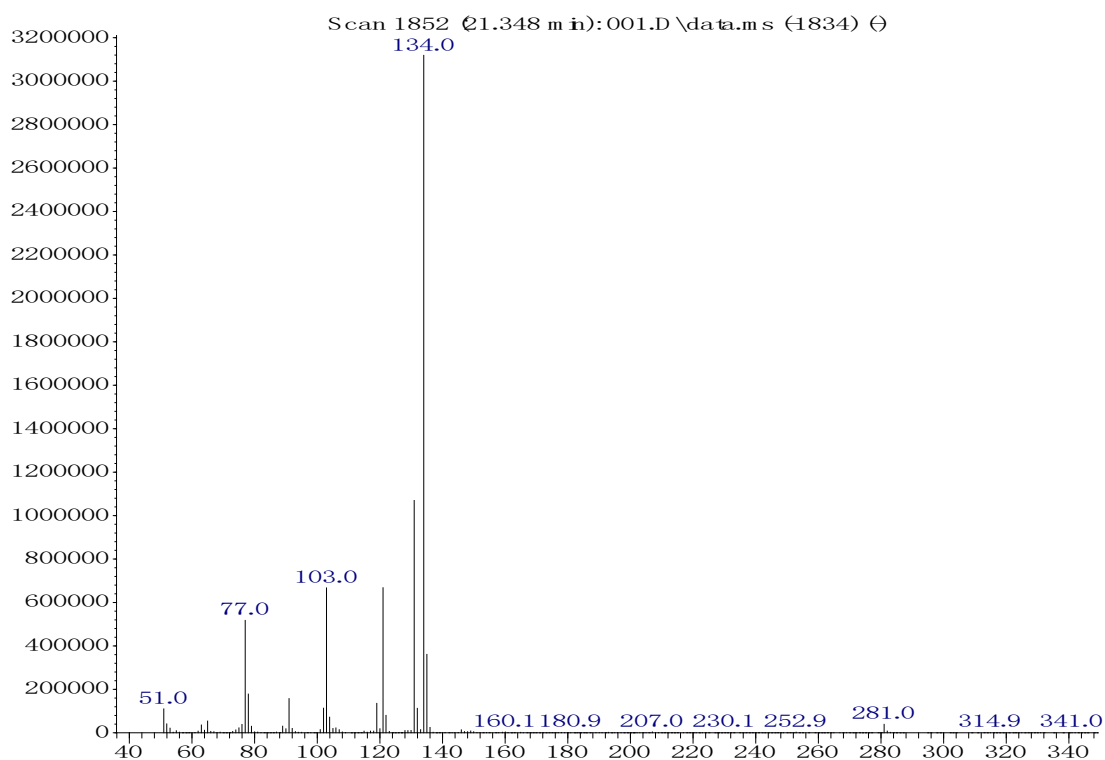

m/z→

**Figure S5.** Mass spectrum of compound 1 ( $\text{CH}_2\text{Cl}_2$ ).

SHIMADZU

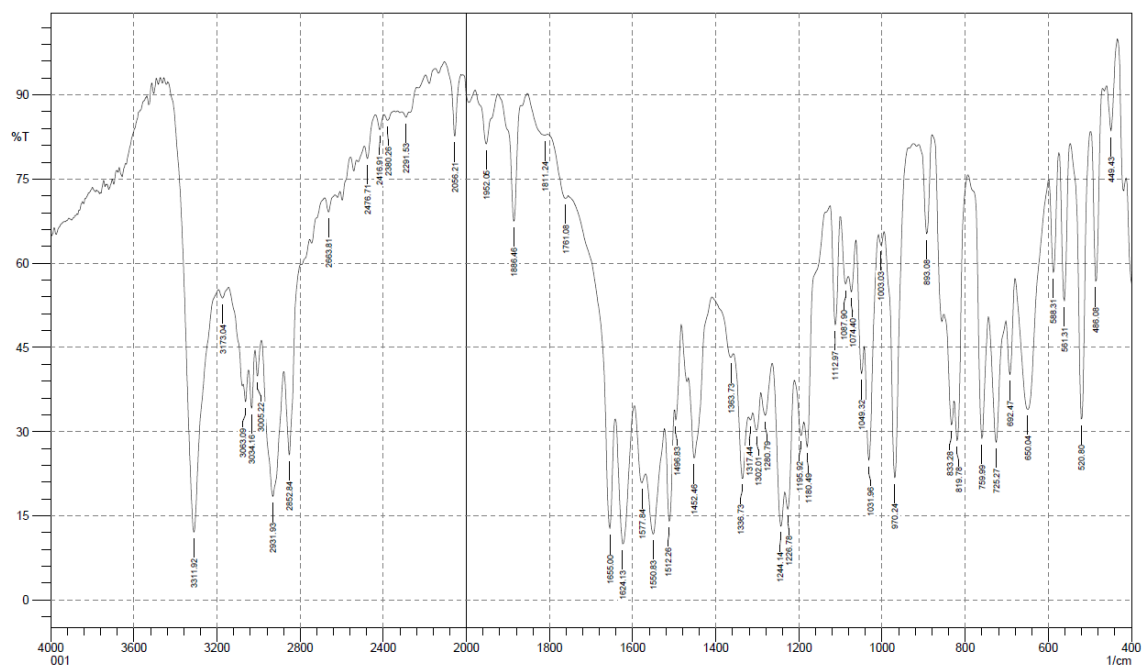

Figure S6. IR spectrum (KBr) of compound 1.

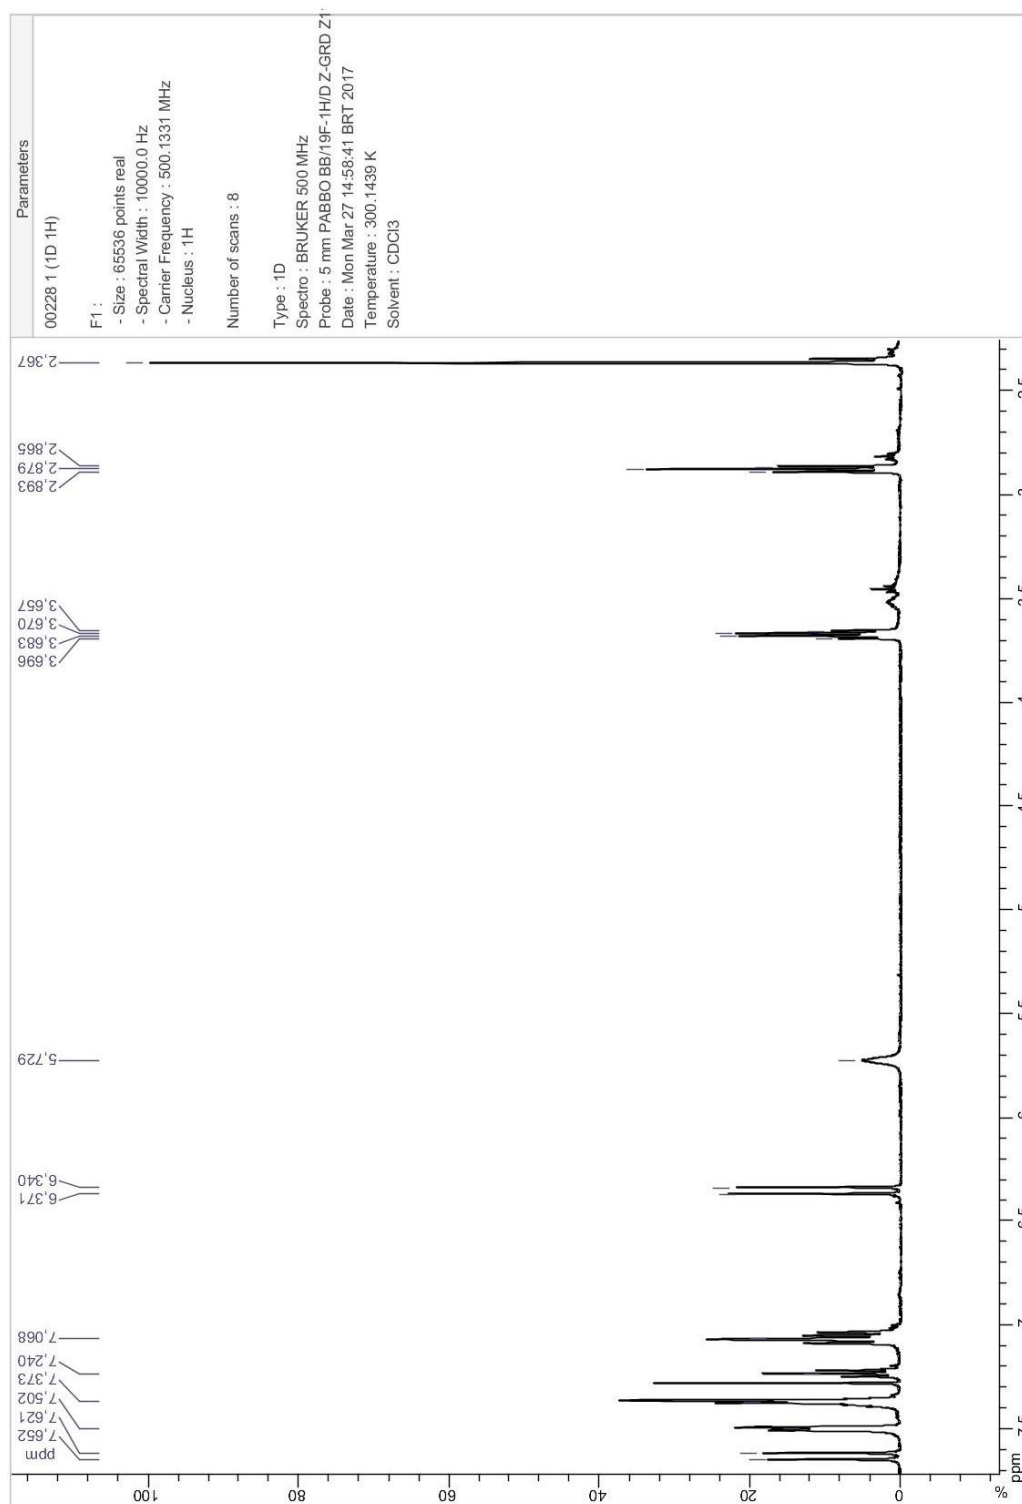

Figure S7.  $^1\text{H}$  NMR spectrum of compound 2 ( $\text{CDCl}_3$ , 500 MHz).



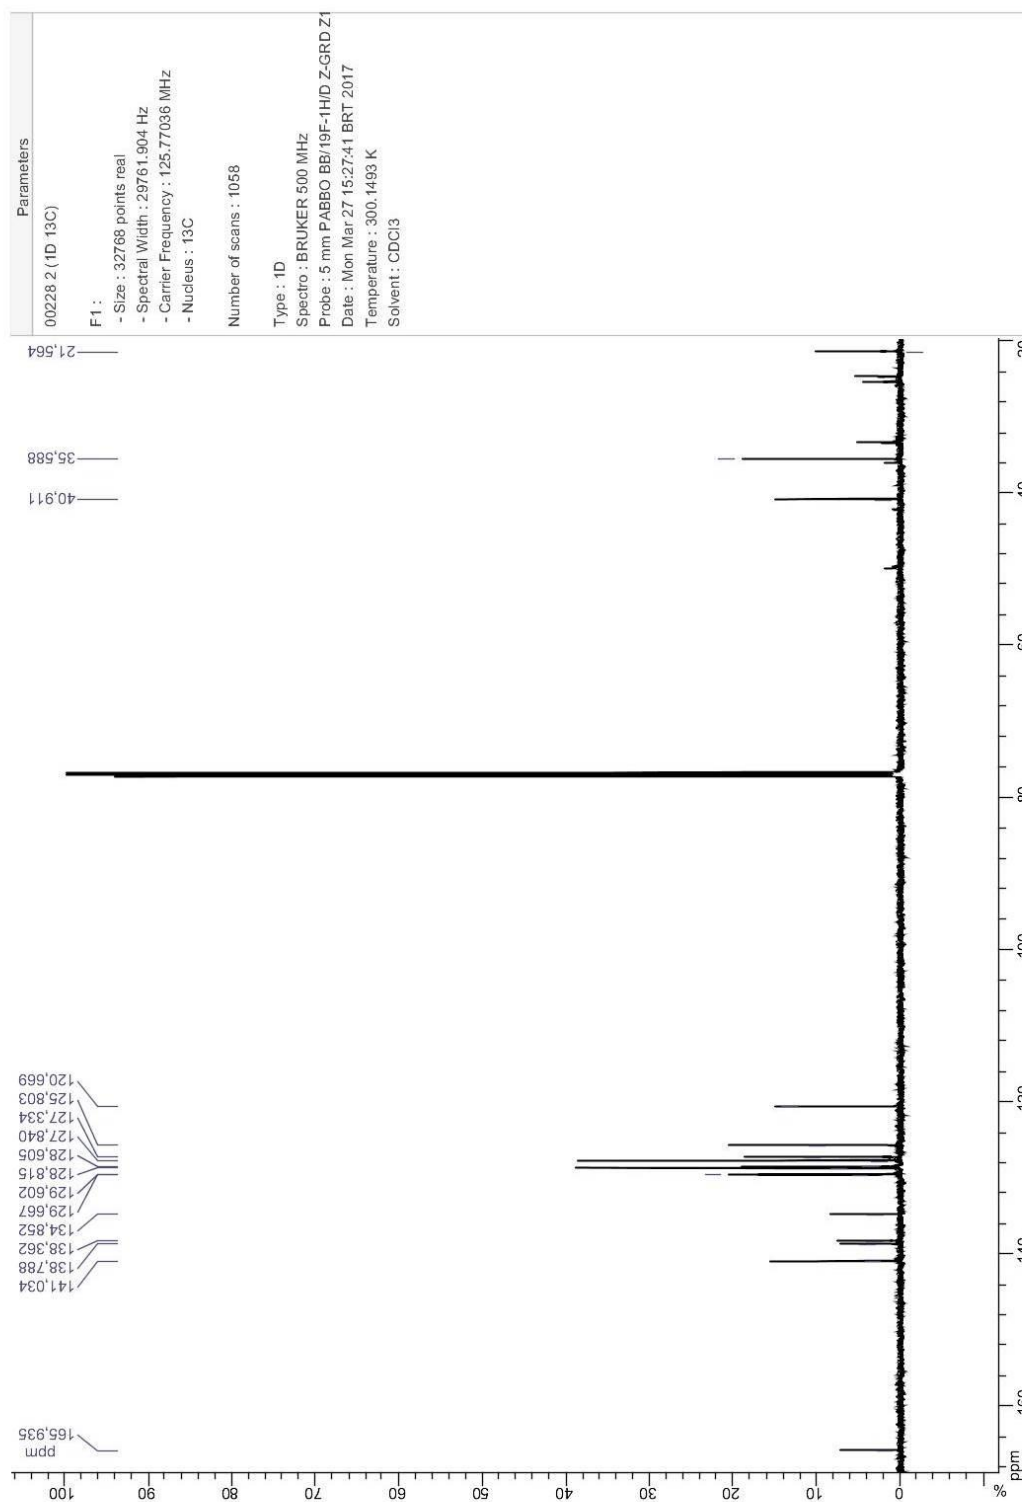

**Figure S8.**  $^{13}\text{C}$  NMR spectrum of compound **2** ( $\text{CDCl}_3$ , 125 MHz).

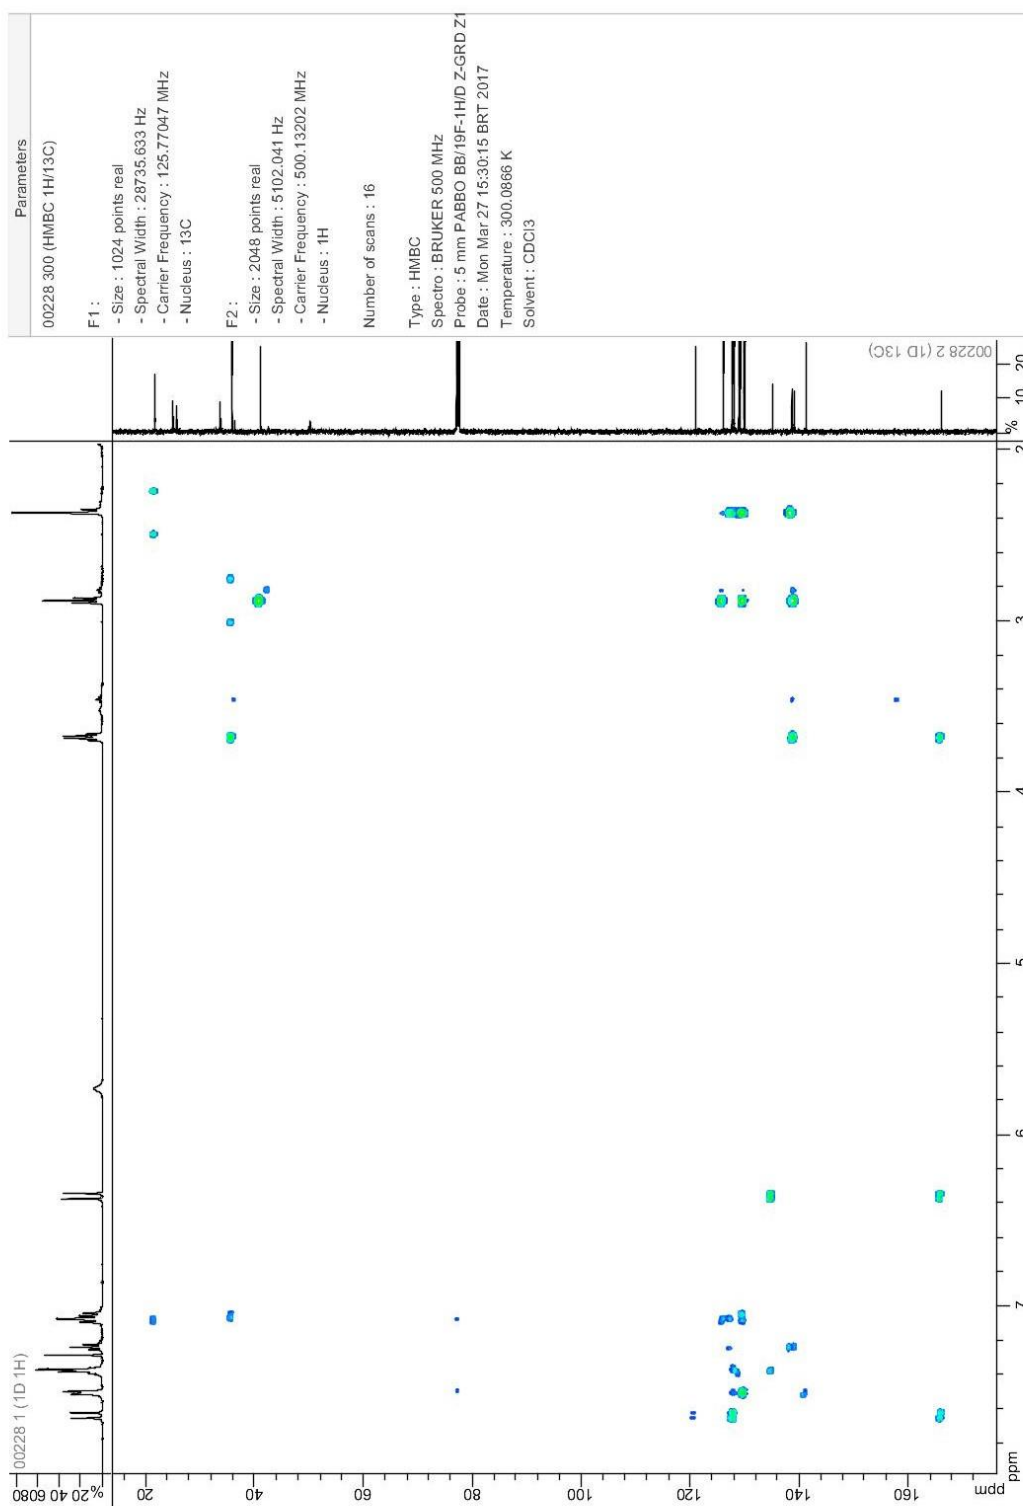

Figure S9. HMBC spectrum of compound 2 (CDCl<sub>3</sub>, 500 MHz).

002 HSQC.ESP

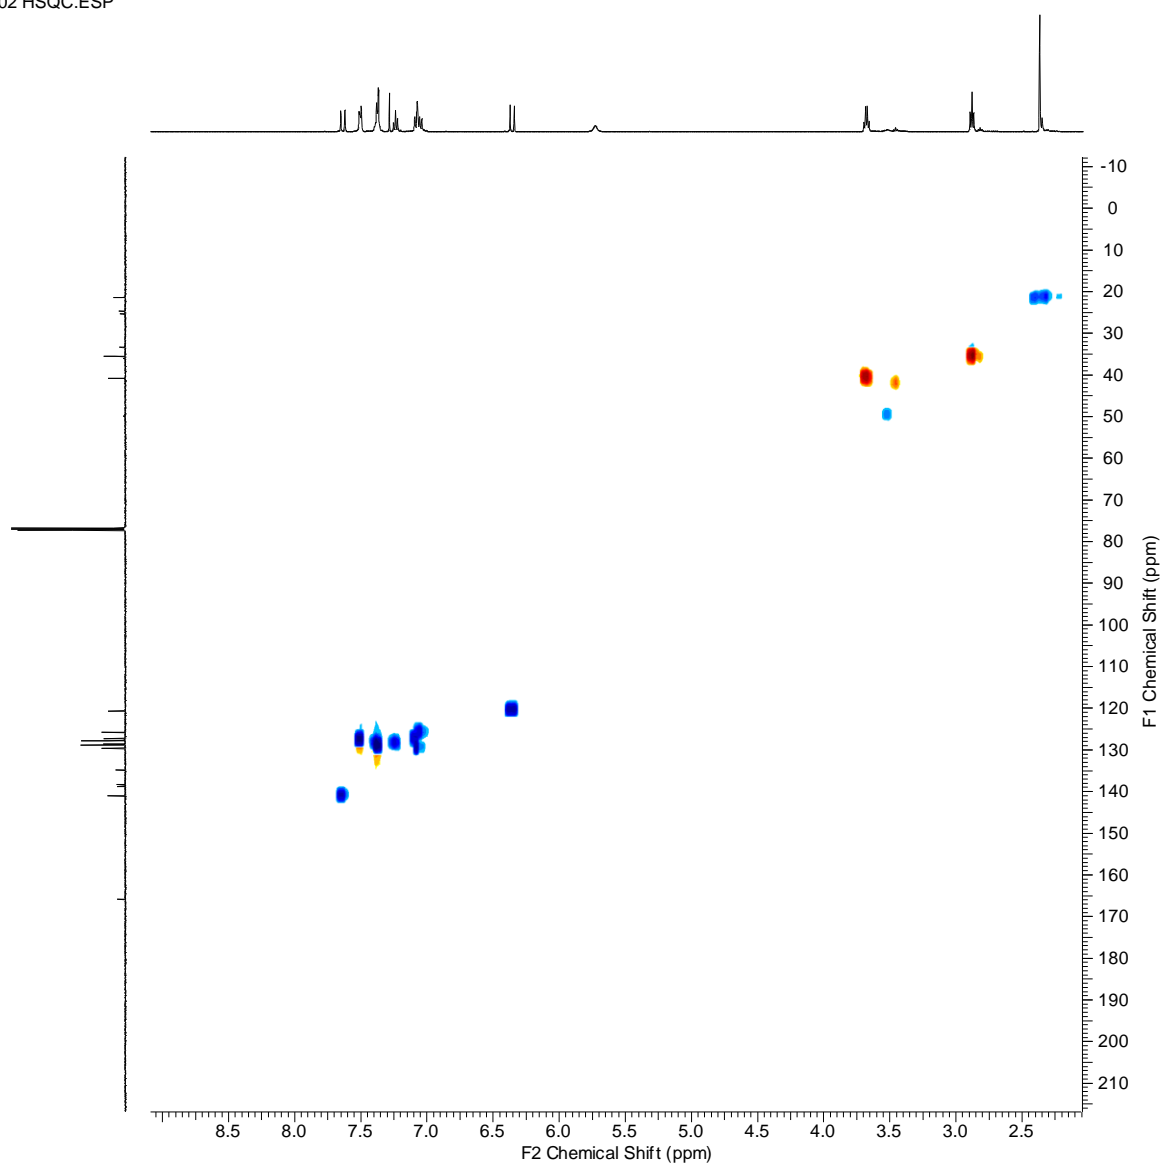

**Figure S10.** HSQC spectrum of compound **2** (CDCl<sub>3</sub>, 500 MHz).

Abundance

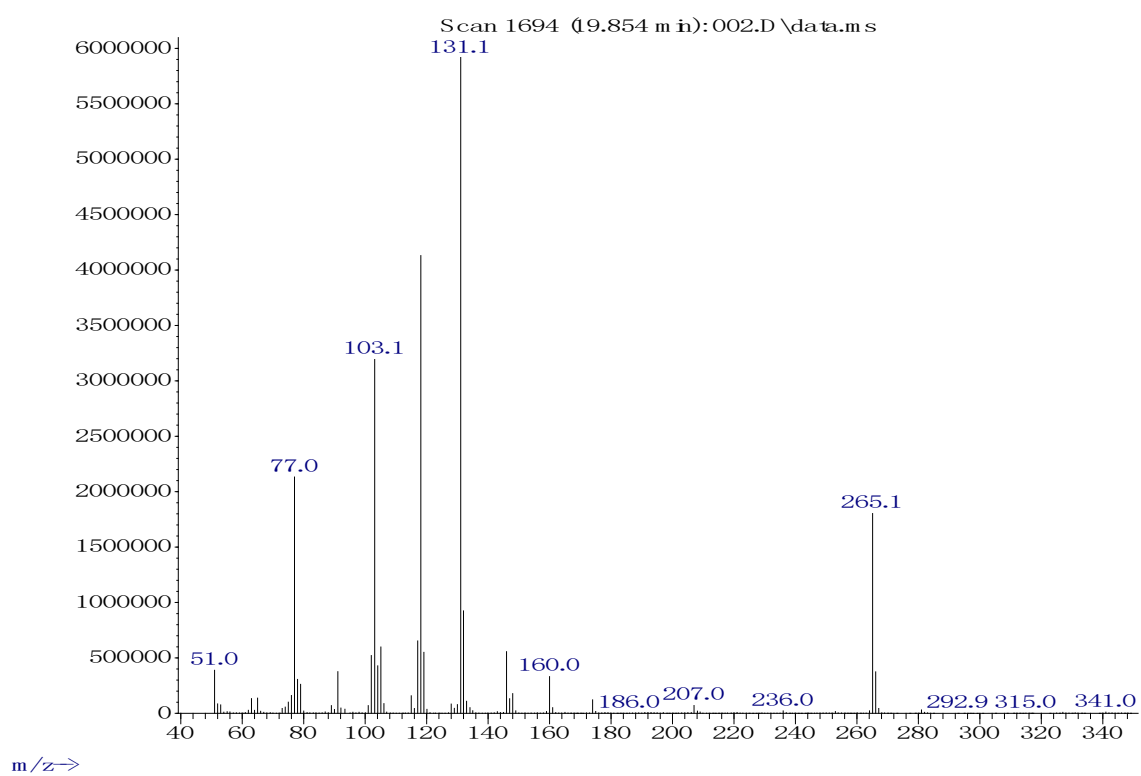

**Figure S11.** Mass spectrum of compound 2 ( $\text{CH}_2\text{Cl}_2$ ).

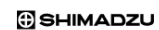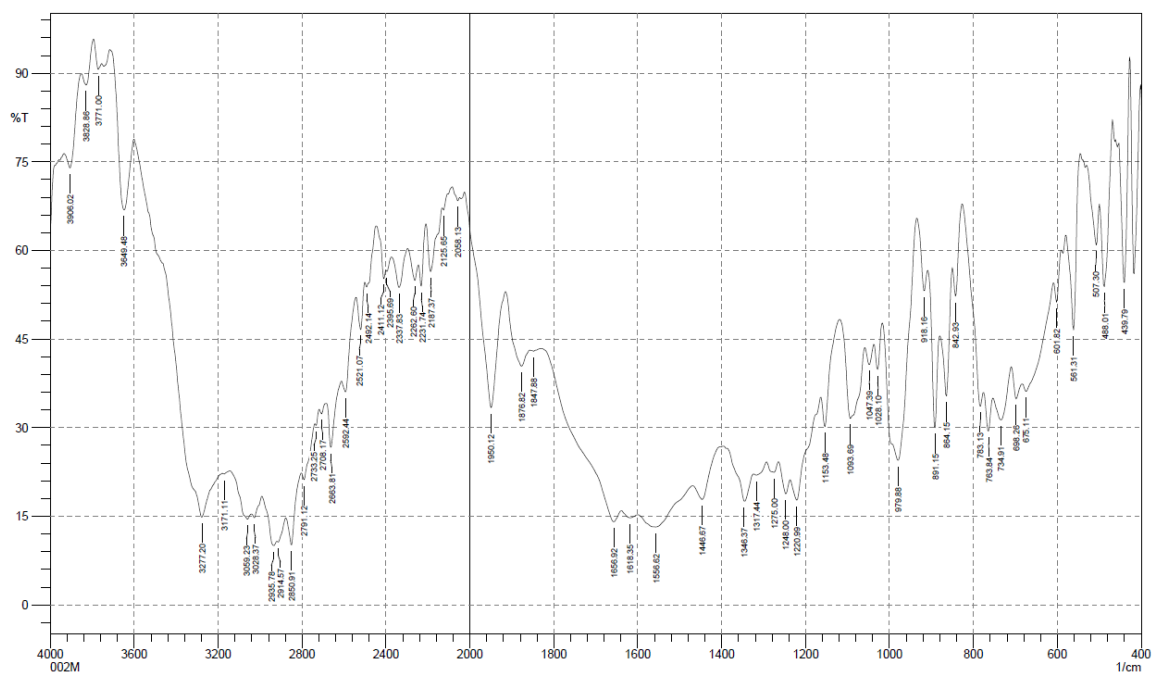

Figure S12. IR spectrum (KBr) of compound 2.

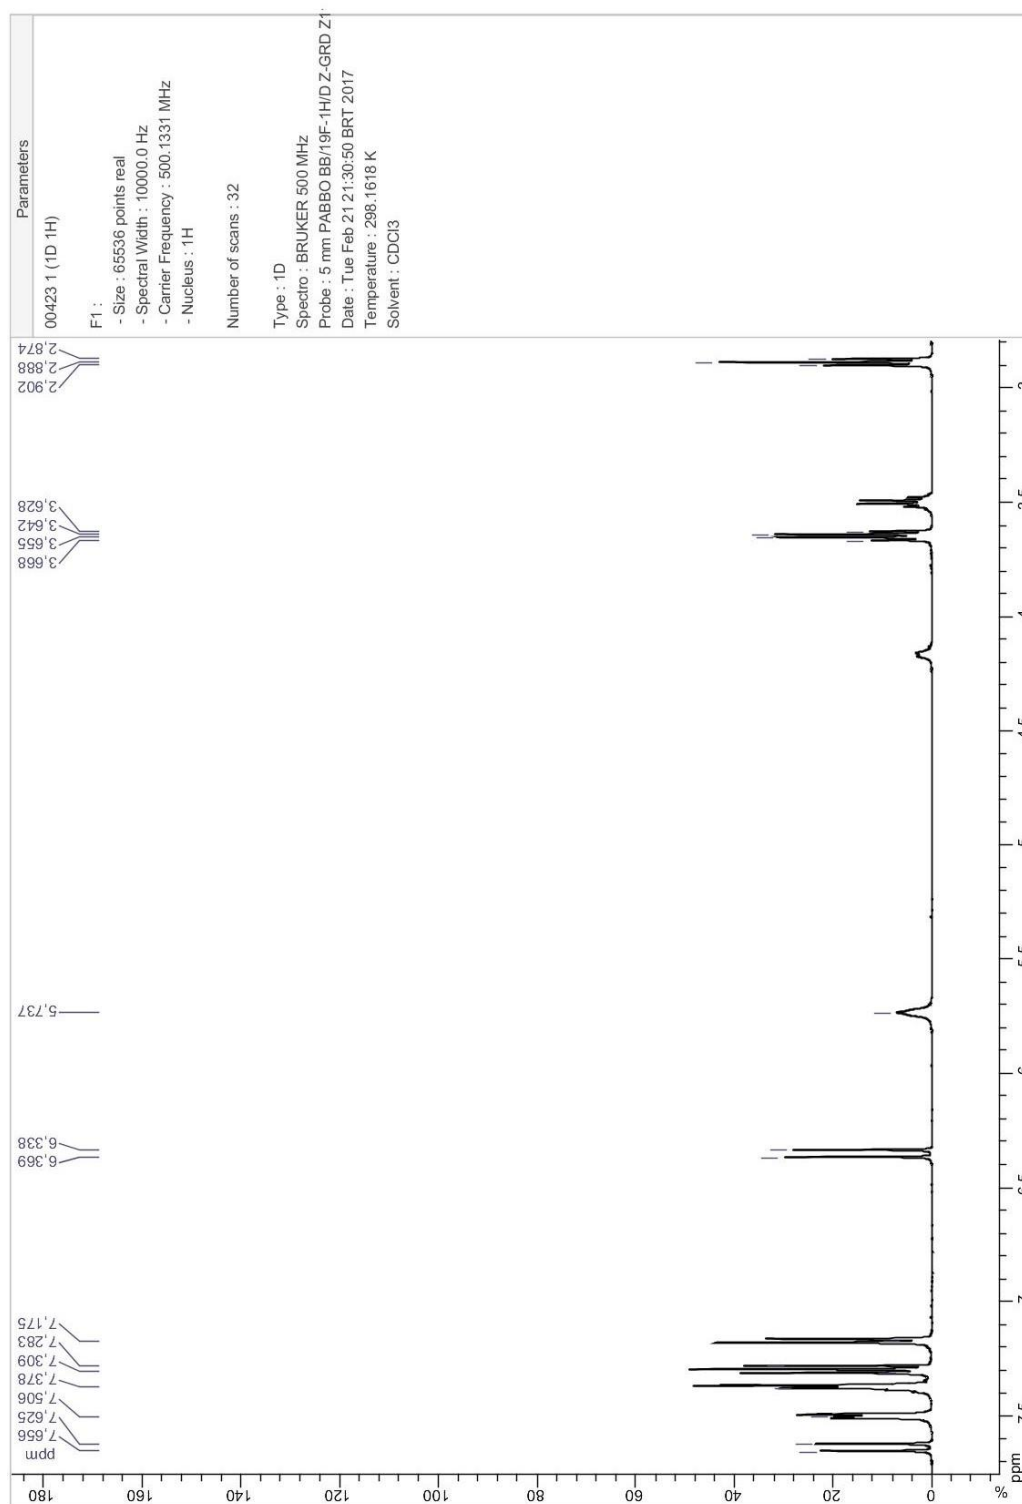

**Figure 13.**  $^1\text{H}$  NMR spectrum of compound **3** ( $\text{CDCl}_3$ , 500 MHz).

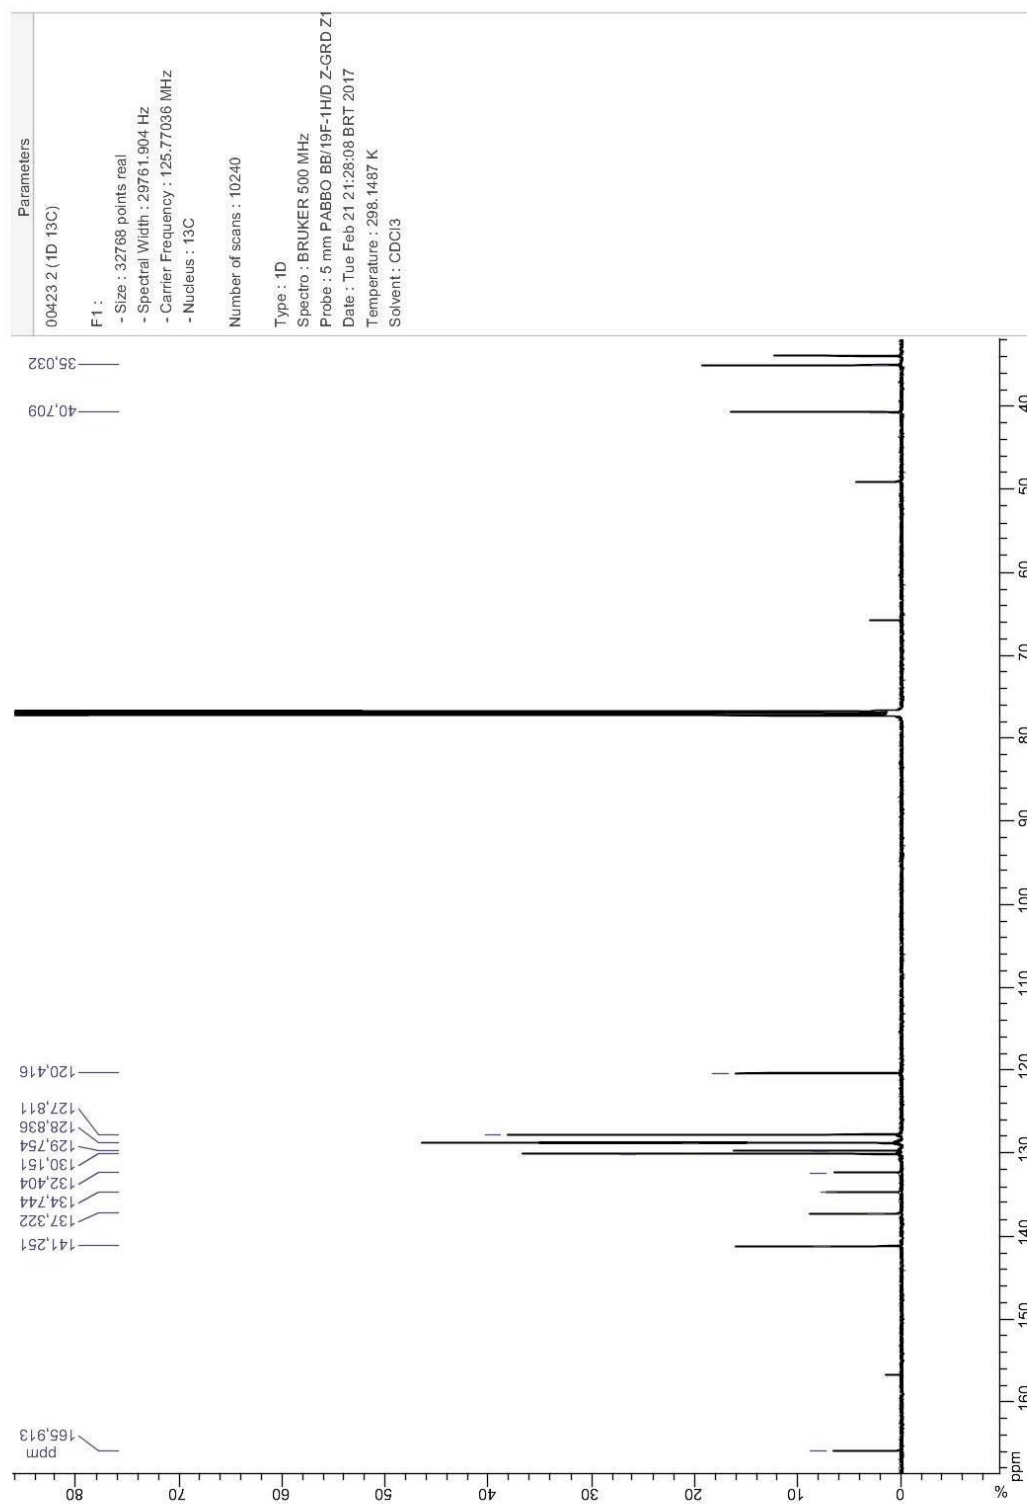

**Figure S14.**  $^{13}\text{C}$  NMR spectrum of compound **3** ( $\text{CDCl}_3$ , 125 MHz).

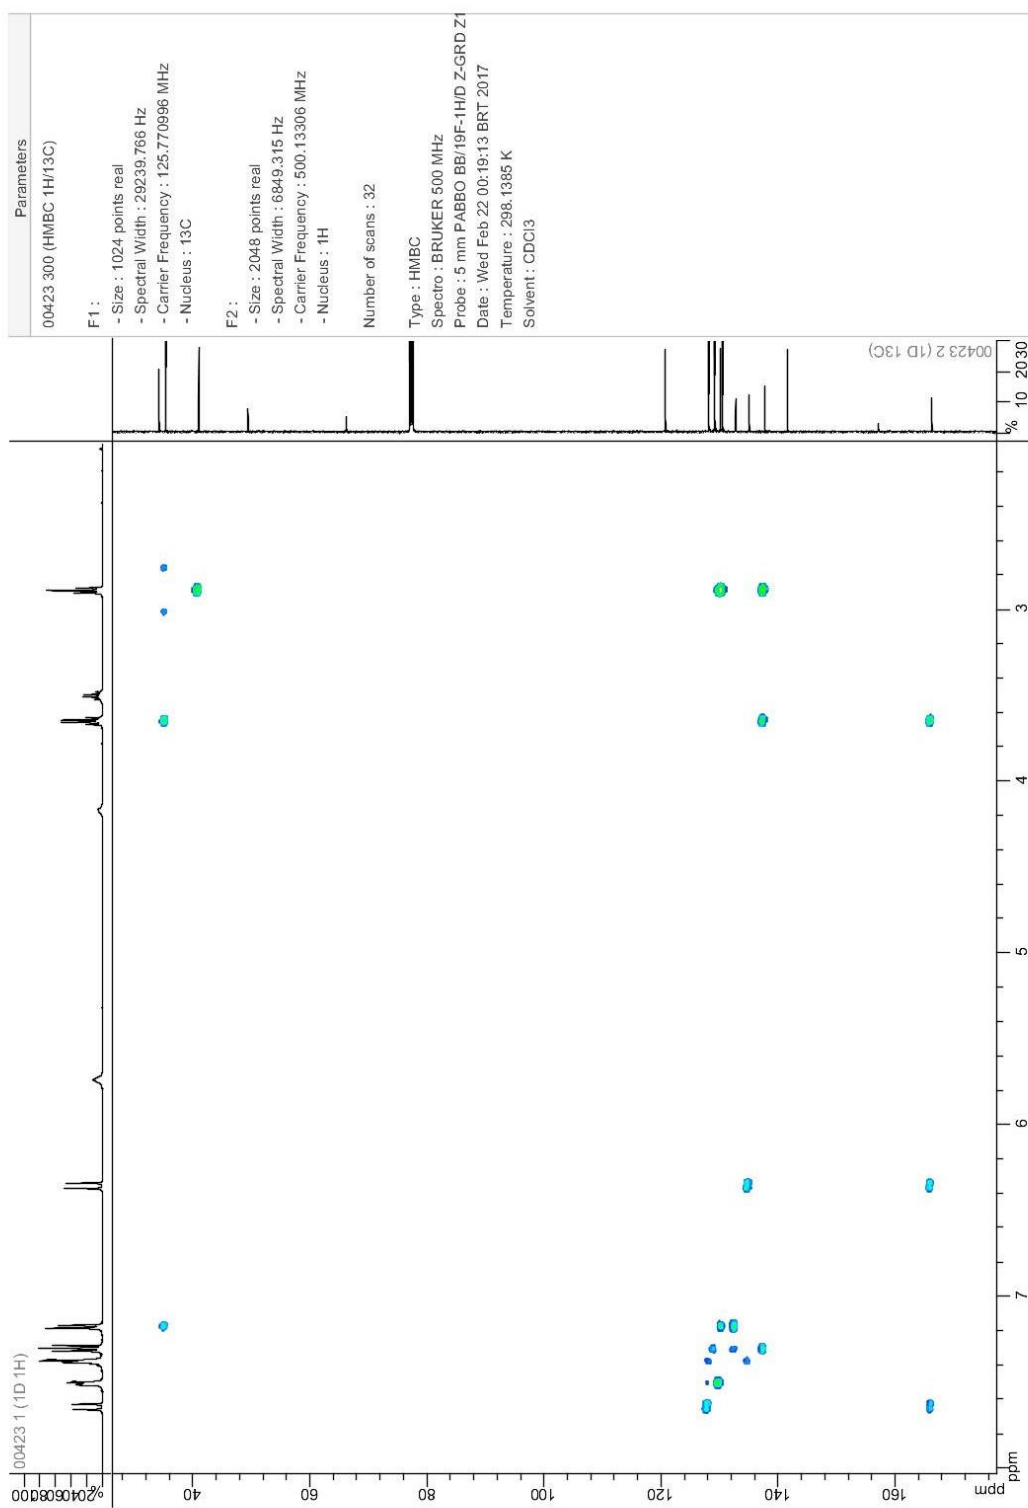

Figure S15. HMBC spectrum of compound 3 (CDCl<sub>3</sub>, 500 MHz).



003 HSQC.ESP

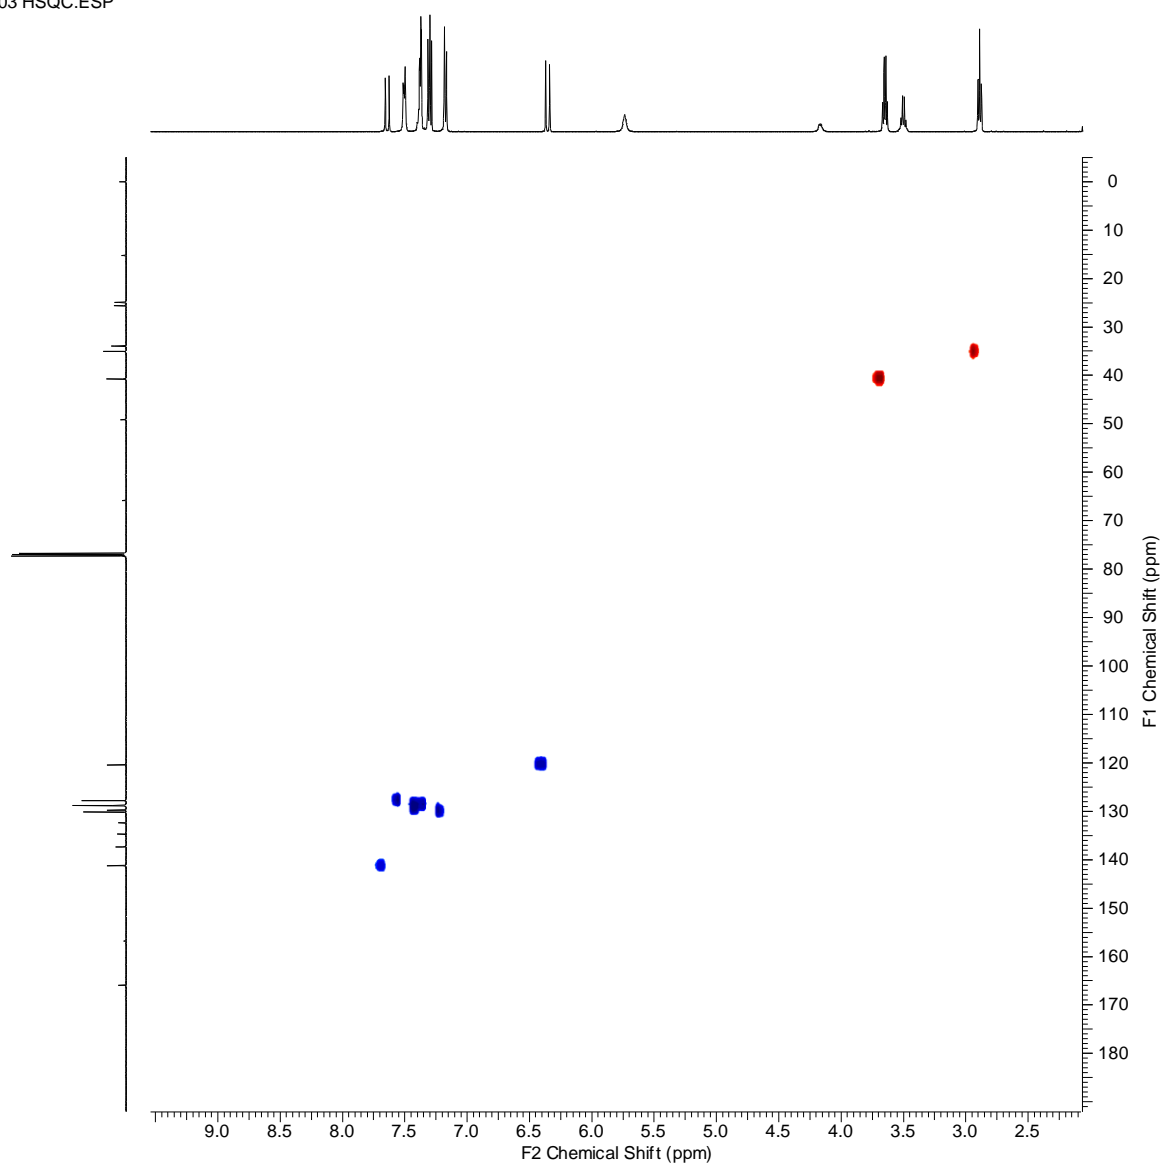

**Figure S16** HSQC spectrum of compound **3** (CDCl<sub>3</sub>, 500 MHz).

Abundance

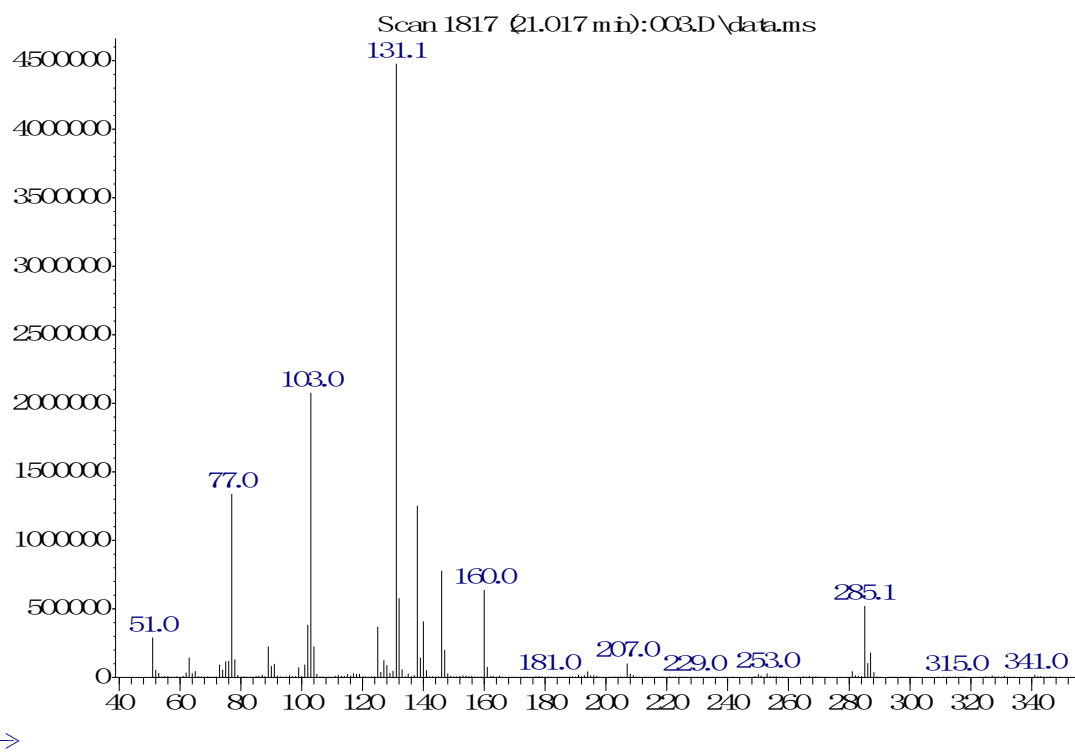

Figure S17. Mass spectrum of compound 3 ( $\text{CH}_2\text{Cl}_2$ ).

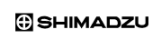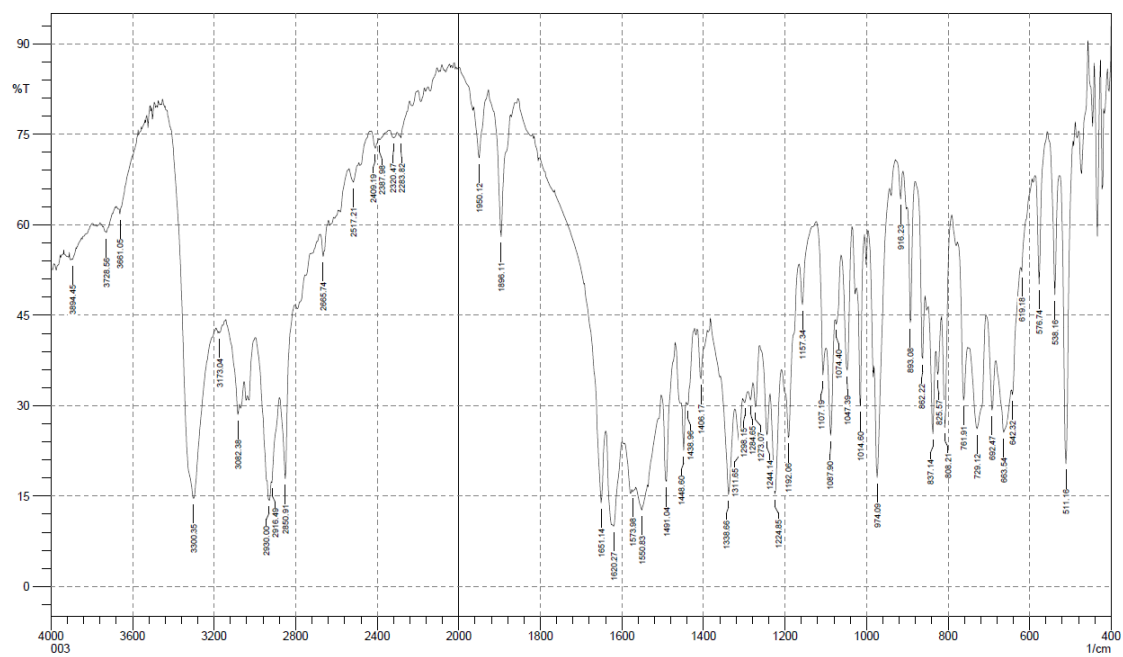

Figure S18. IR spectrum (KBr) of compound 3.

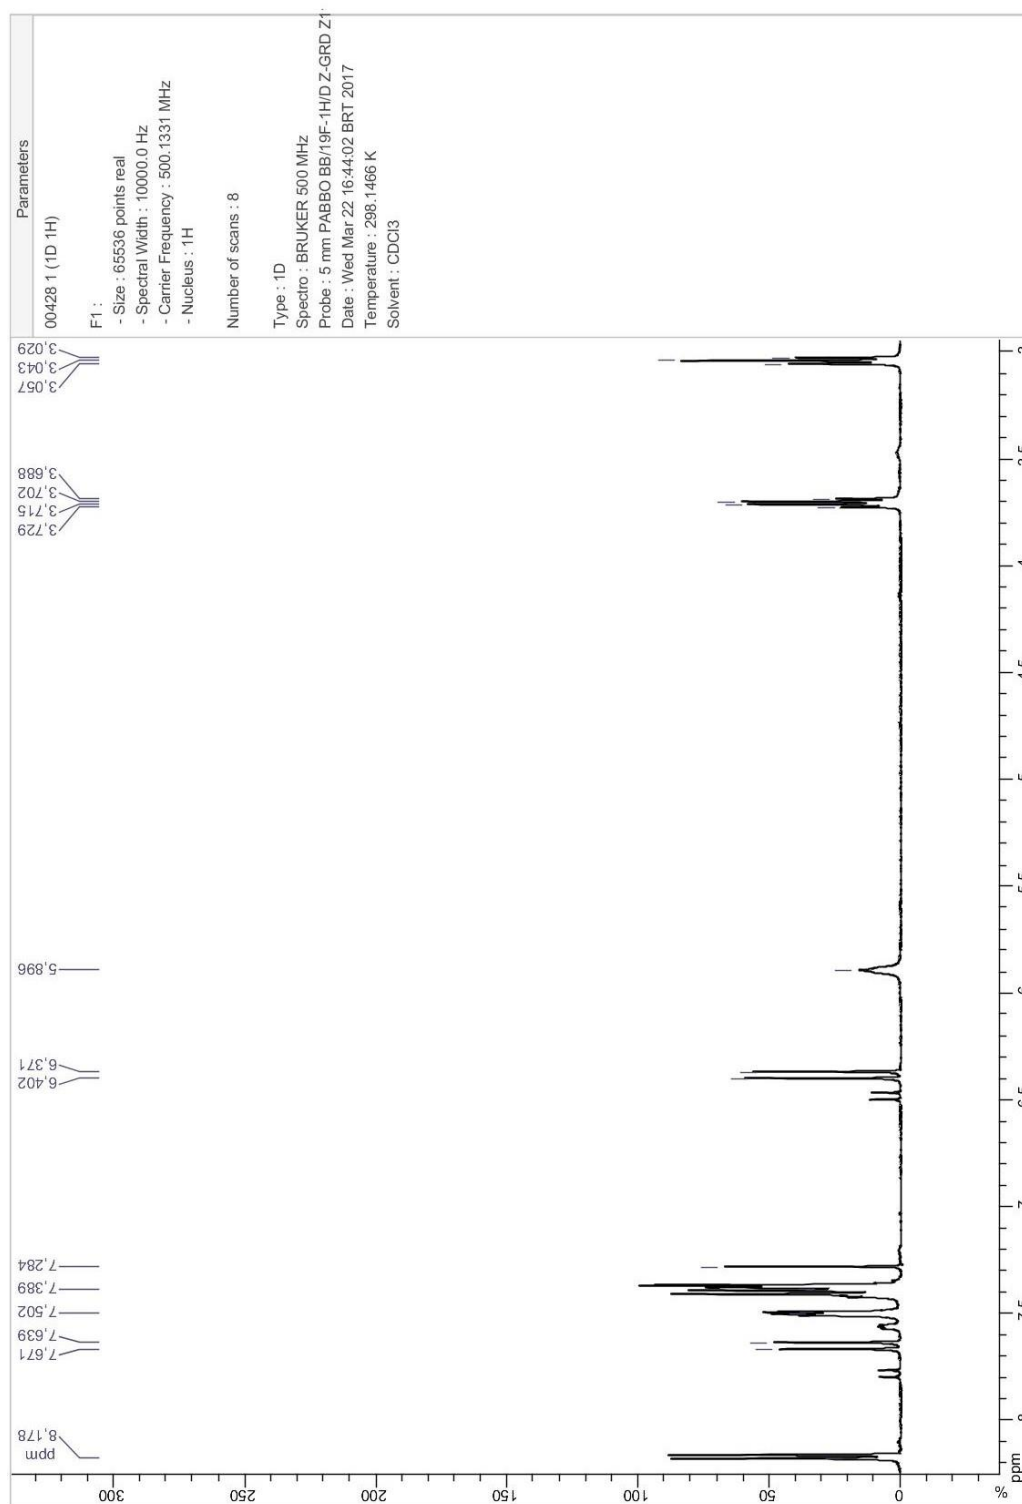

**Figure S19.**  $^1\text{H}$  NMR spectrum of compound 4 ( $\text{CDCl}_3$ , 500 MHz).

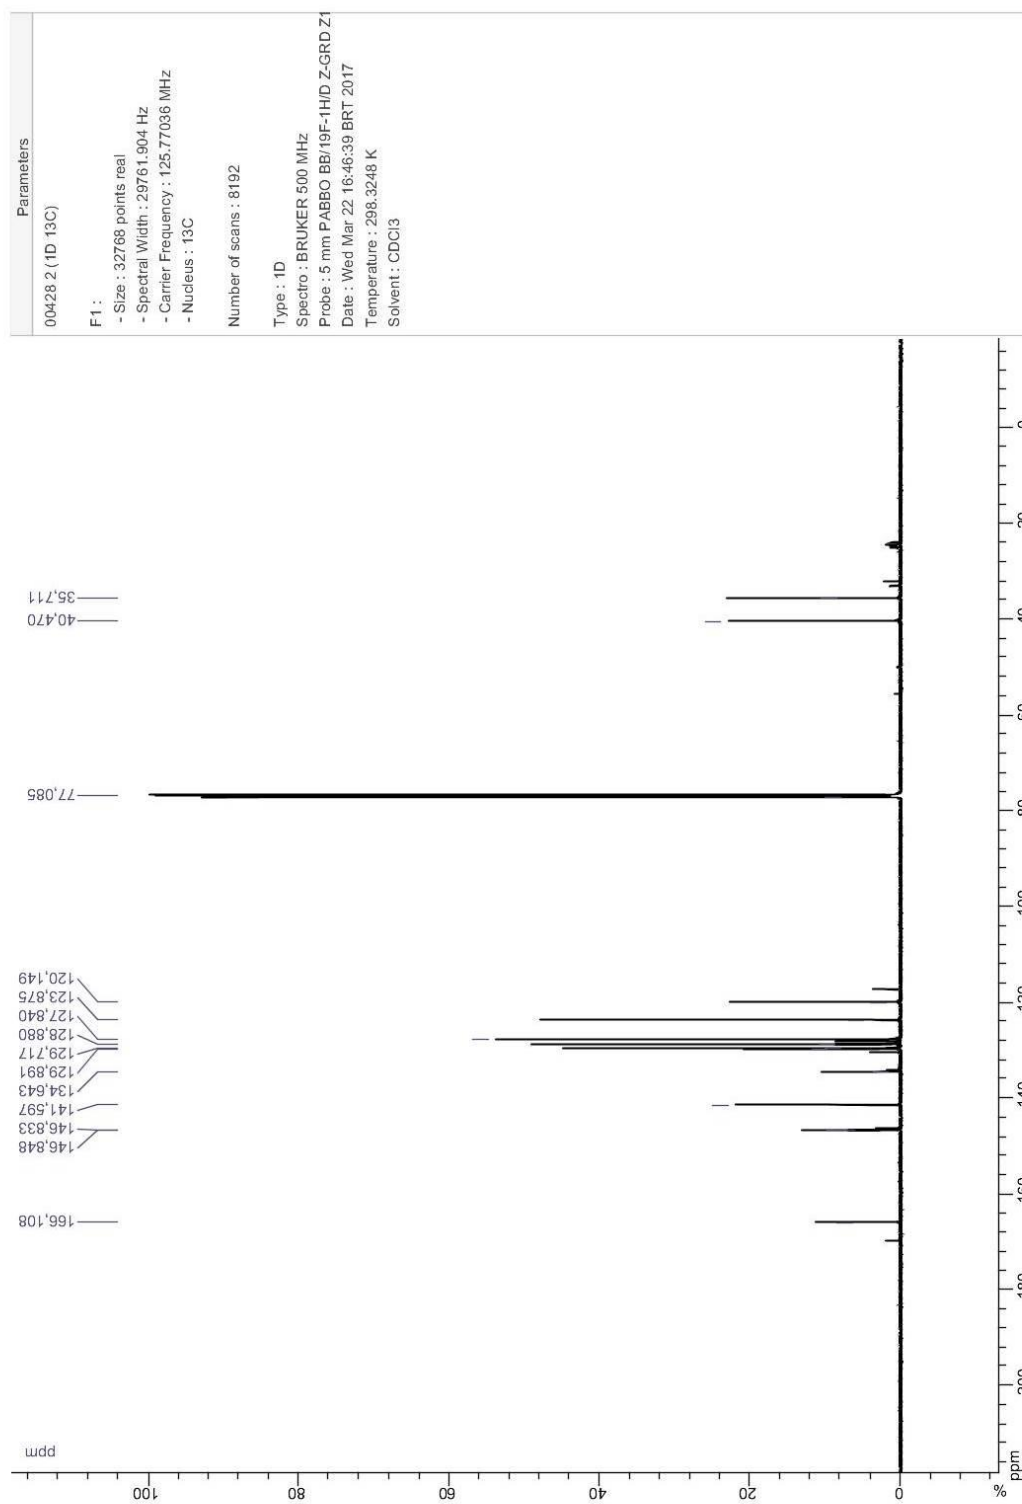

**Figure S20.**  $^{13}\text{C}$  NMR spectrum of compound 4 ( $\text{CDCl}_3$ , 125 MHz).



004 HSQCED.ESP

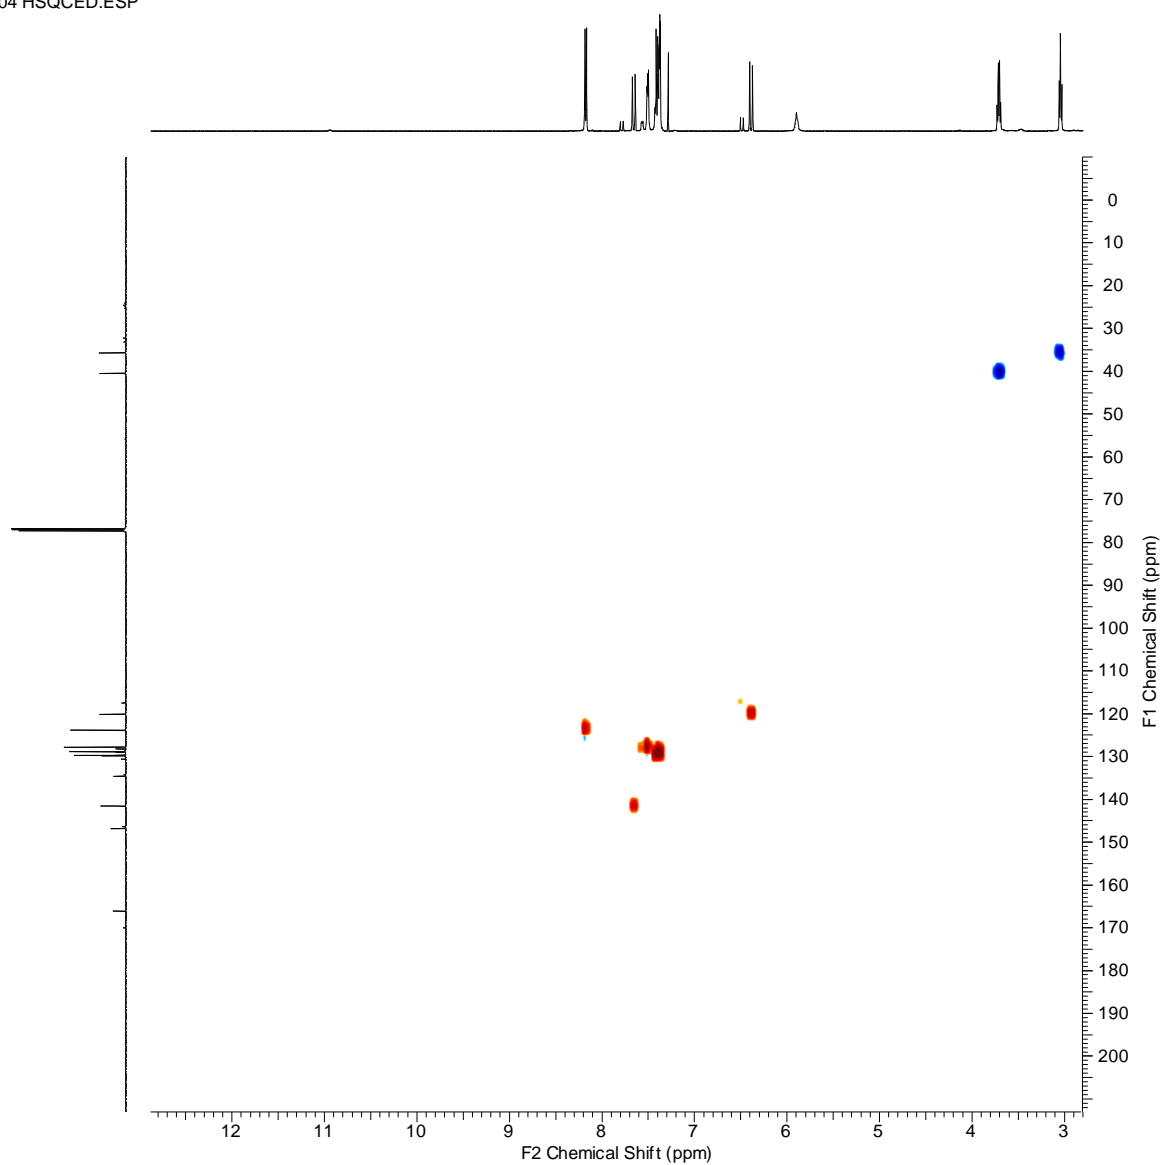

**Figure S22.** HSQC spectrum of compound **4** (CDCl<sub>3</sub>, 500 MHz).

Abundance

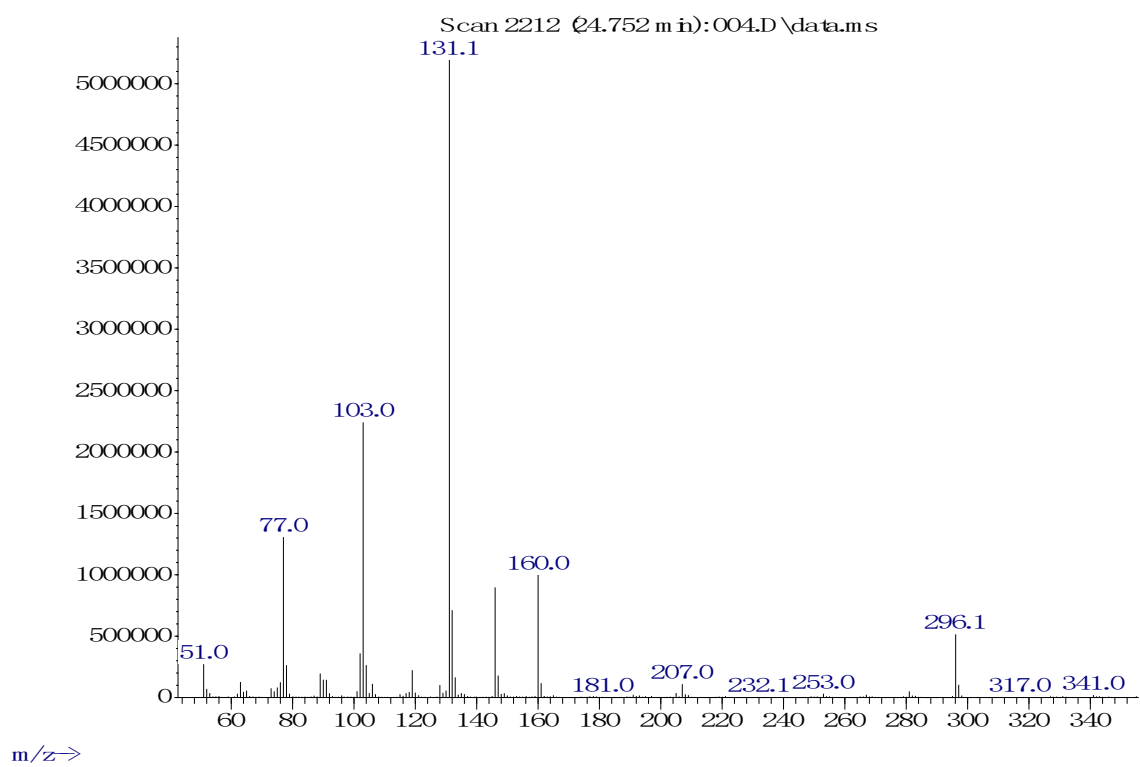

Figure S23. Mass spectrum of compound 4 (CH<sub>2</sub>Cl<sub>2</sub>).



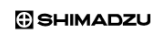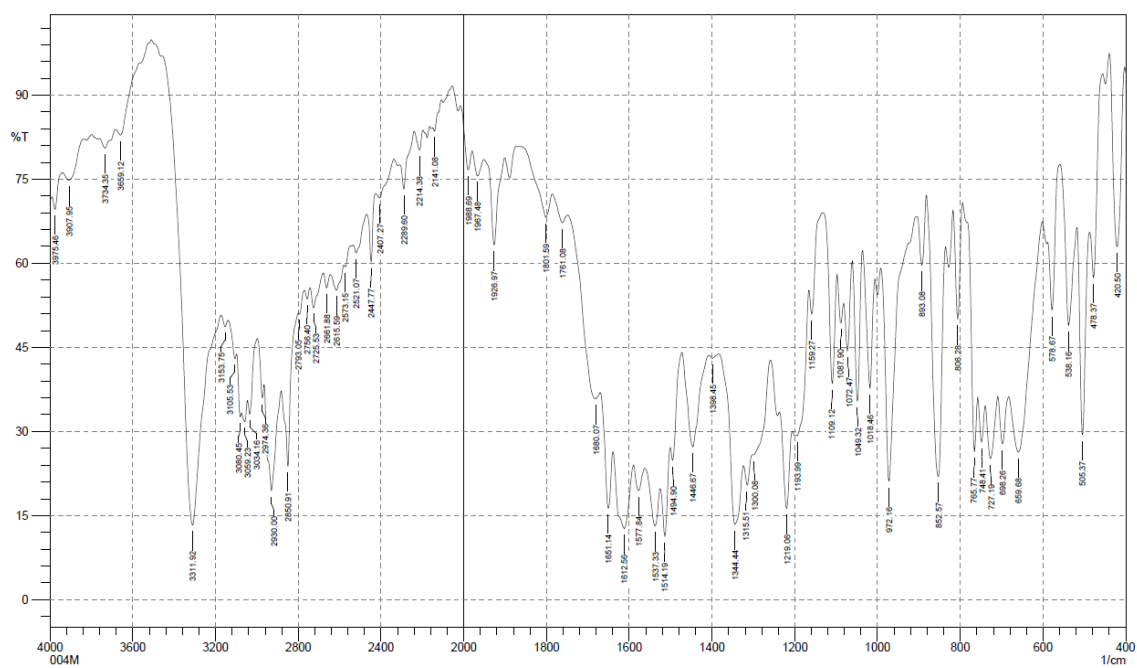

Figure S24. IR spectrum (KBr) of compound 4.

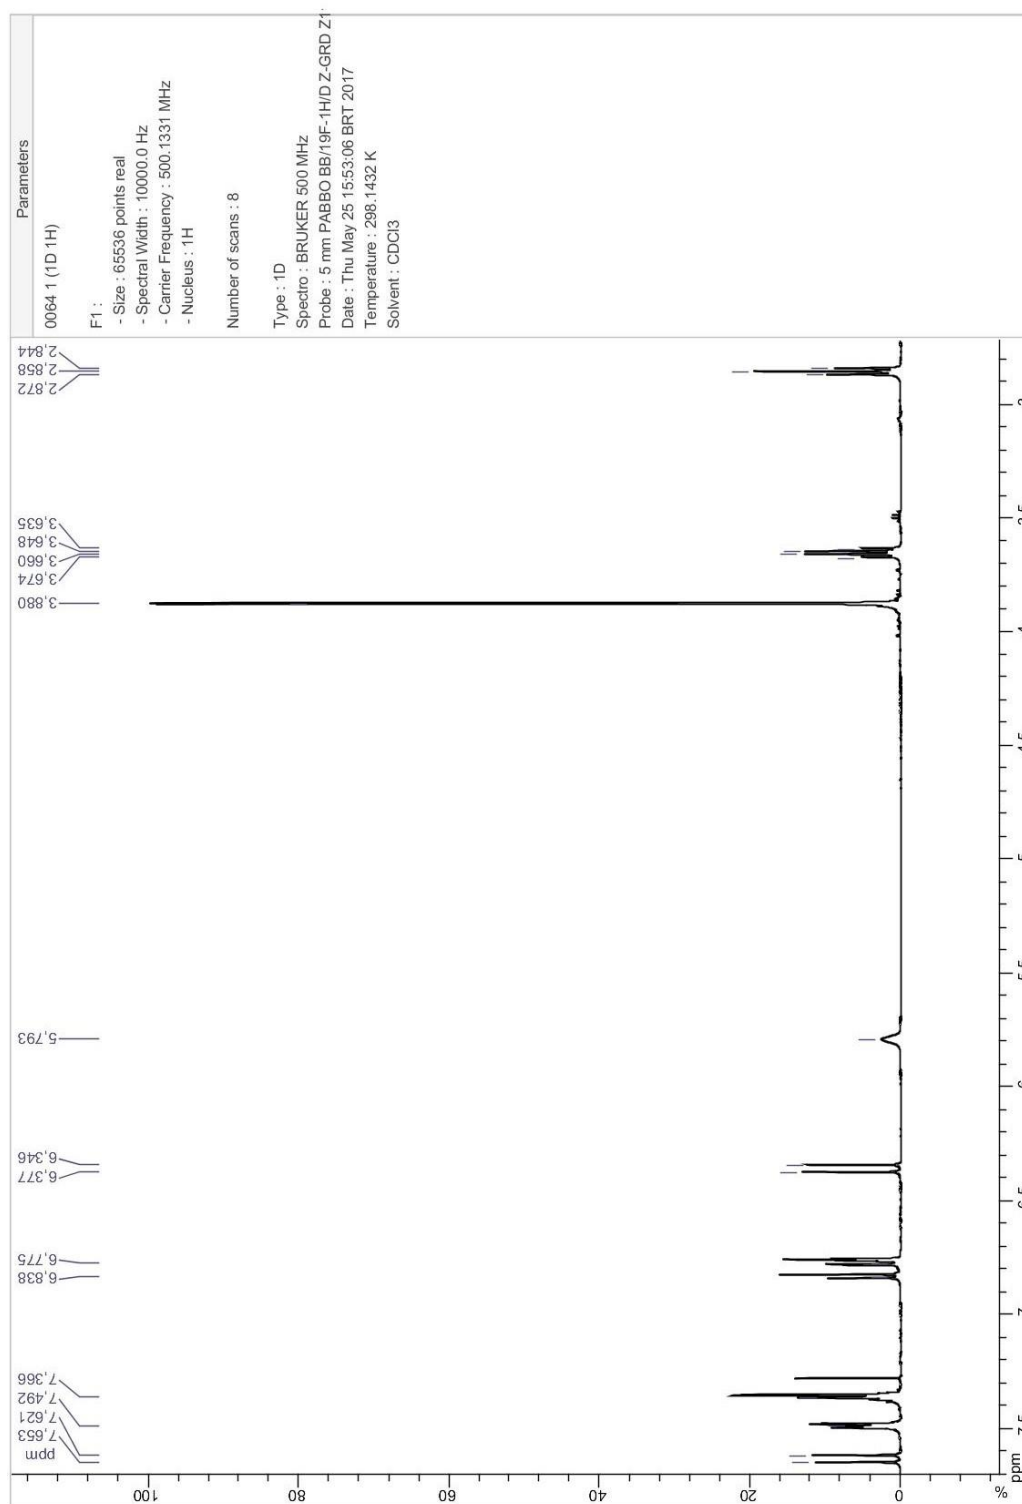

**Figure S25.**  $^1\text{H}$  NMR spectrum of compound 5 ( $\text{CDCl}_3$ , 500 MHz).

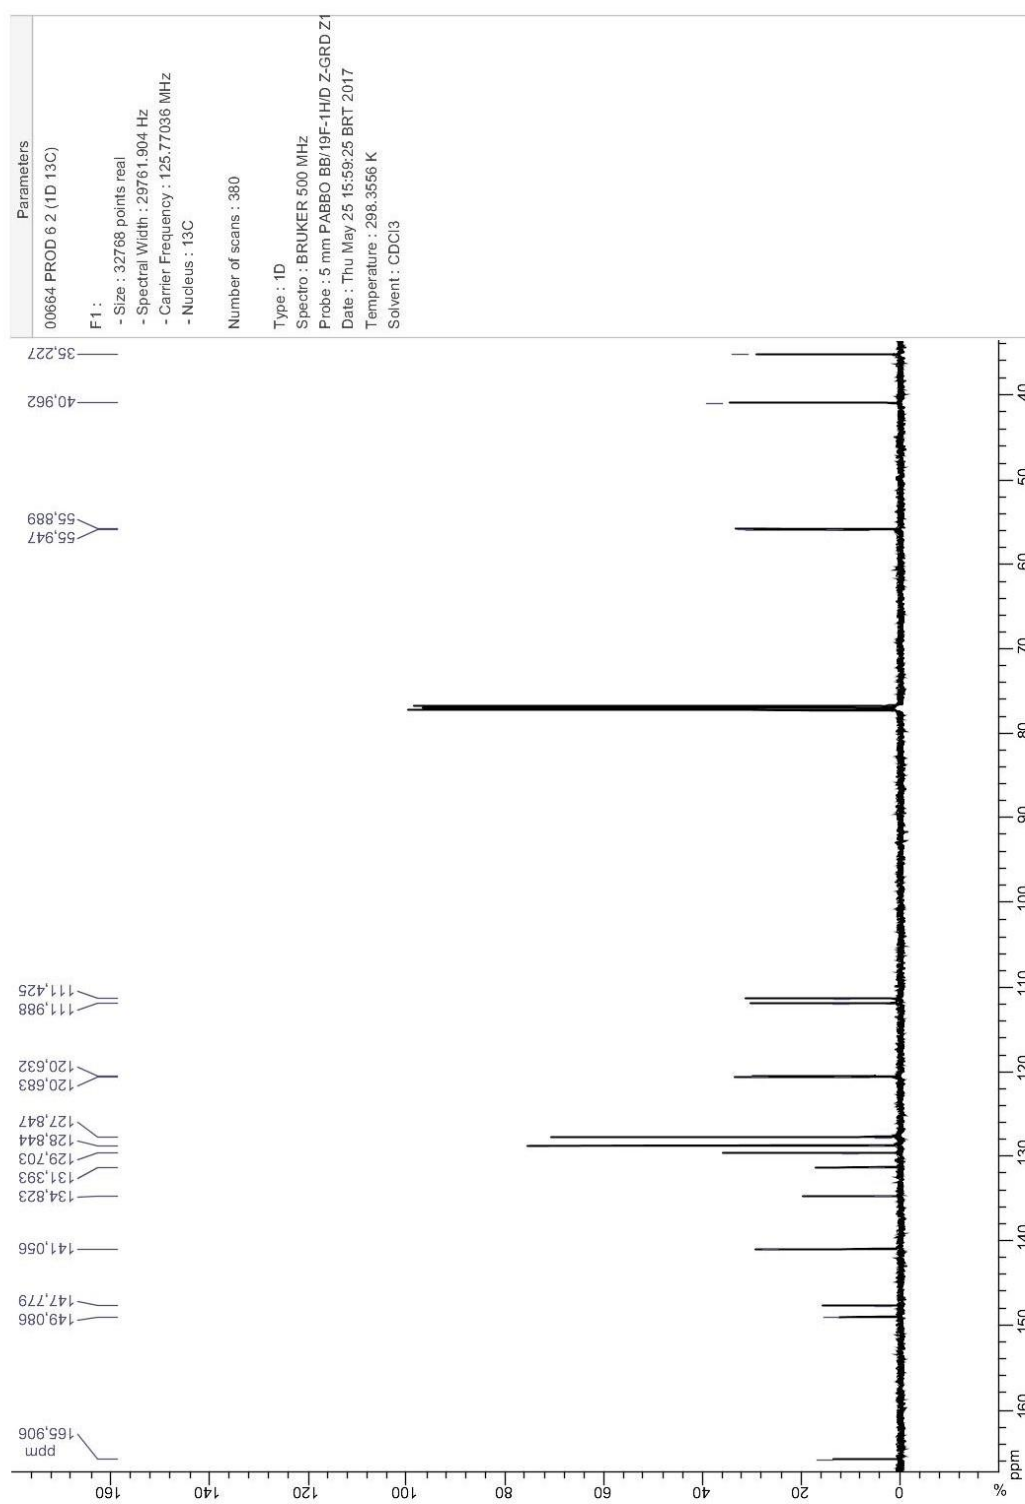

Figure S26.  $^{13}\text{C}$  NMR spectrum of compound 5 ( $\text{CDCl}_3$ , 125 MHz).

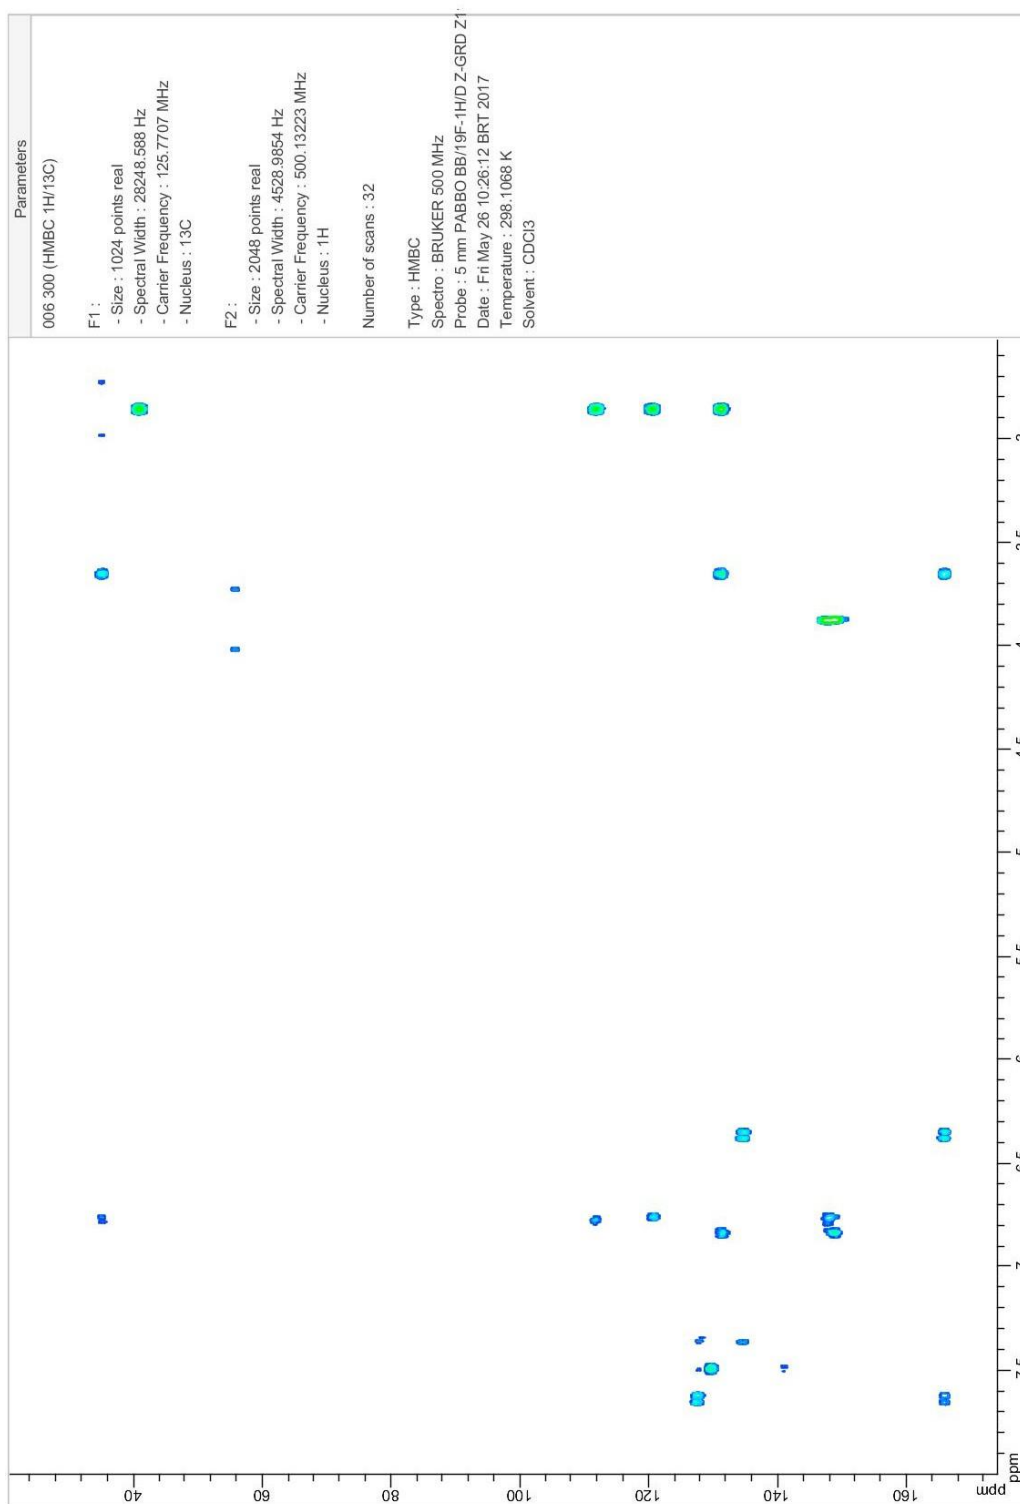

Figure S27. HMBC spectrum of compound 5 (CDCl<sub>3</sub>, 500 MHz).

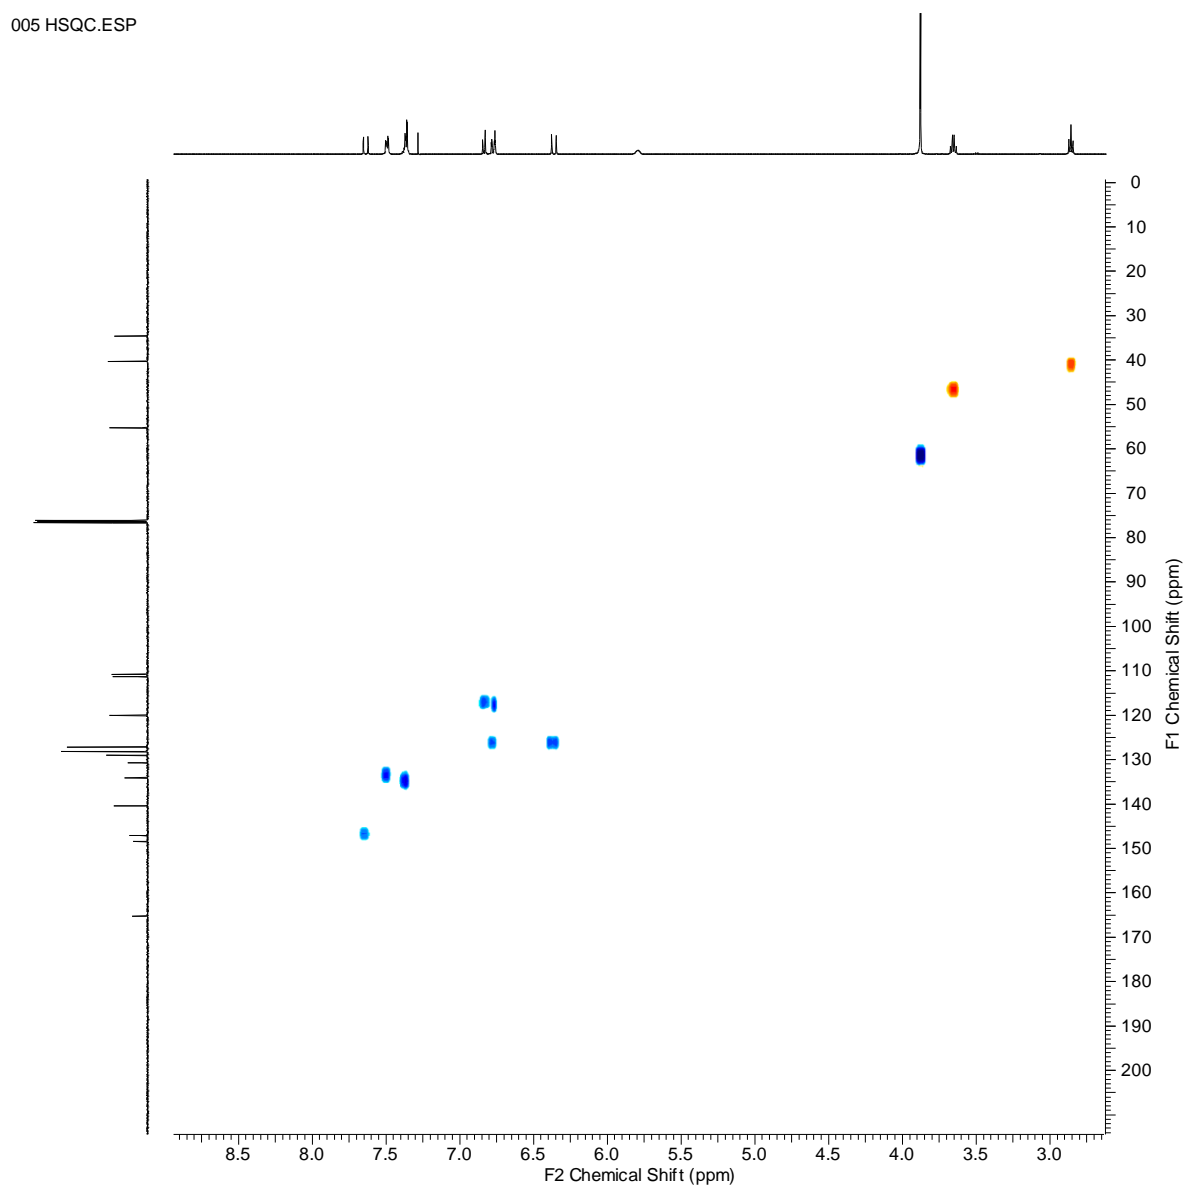

**Figure S28.** HSQC spectrum of compound **5** ( $\text{CDCl}_3$ , 500 MHz).

Abundance

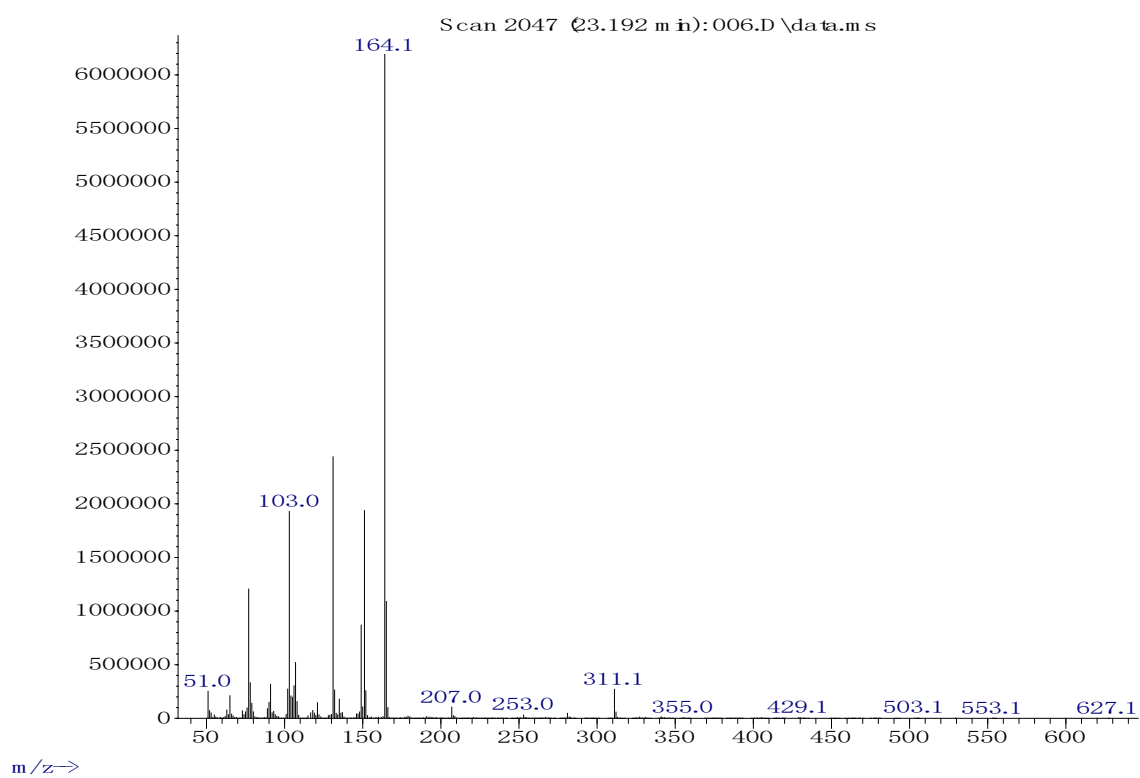

**Figure S29.** Mass spectrum of compound 5 ( $\text{CH}_2\text{Cl}_2$ ).

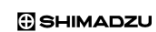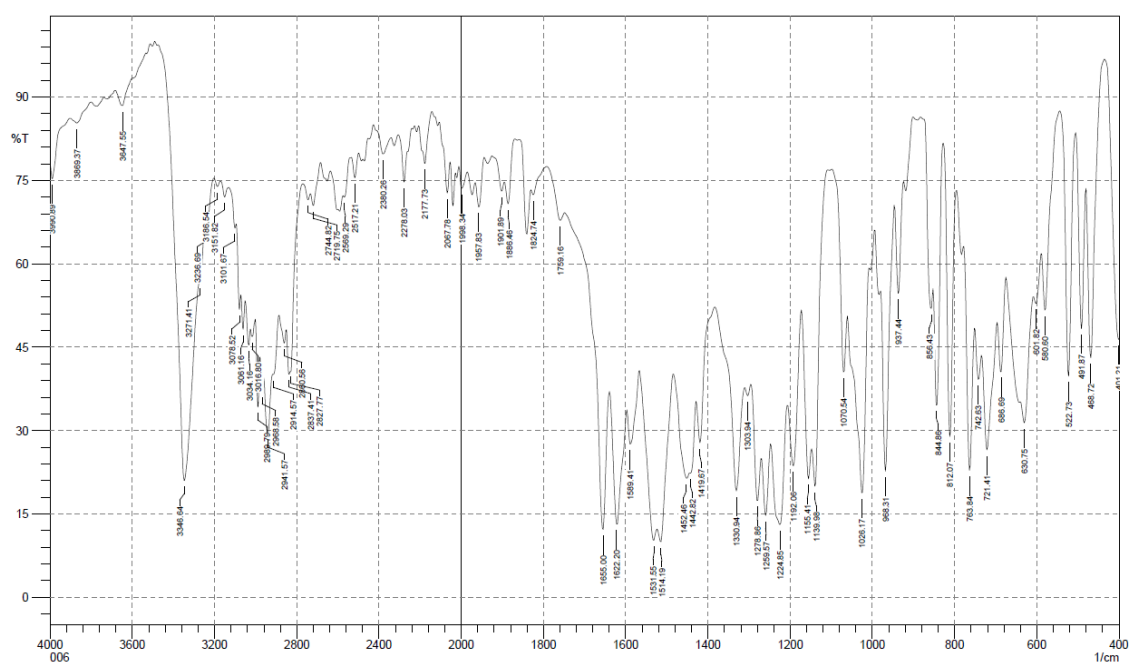

Figure S30. IR spectrum (KBr) of compound 5.

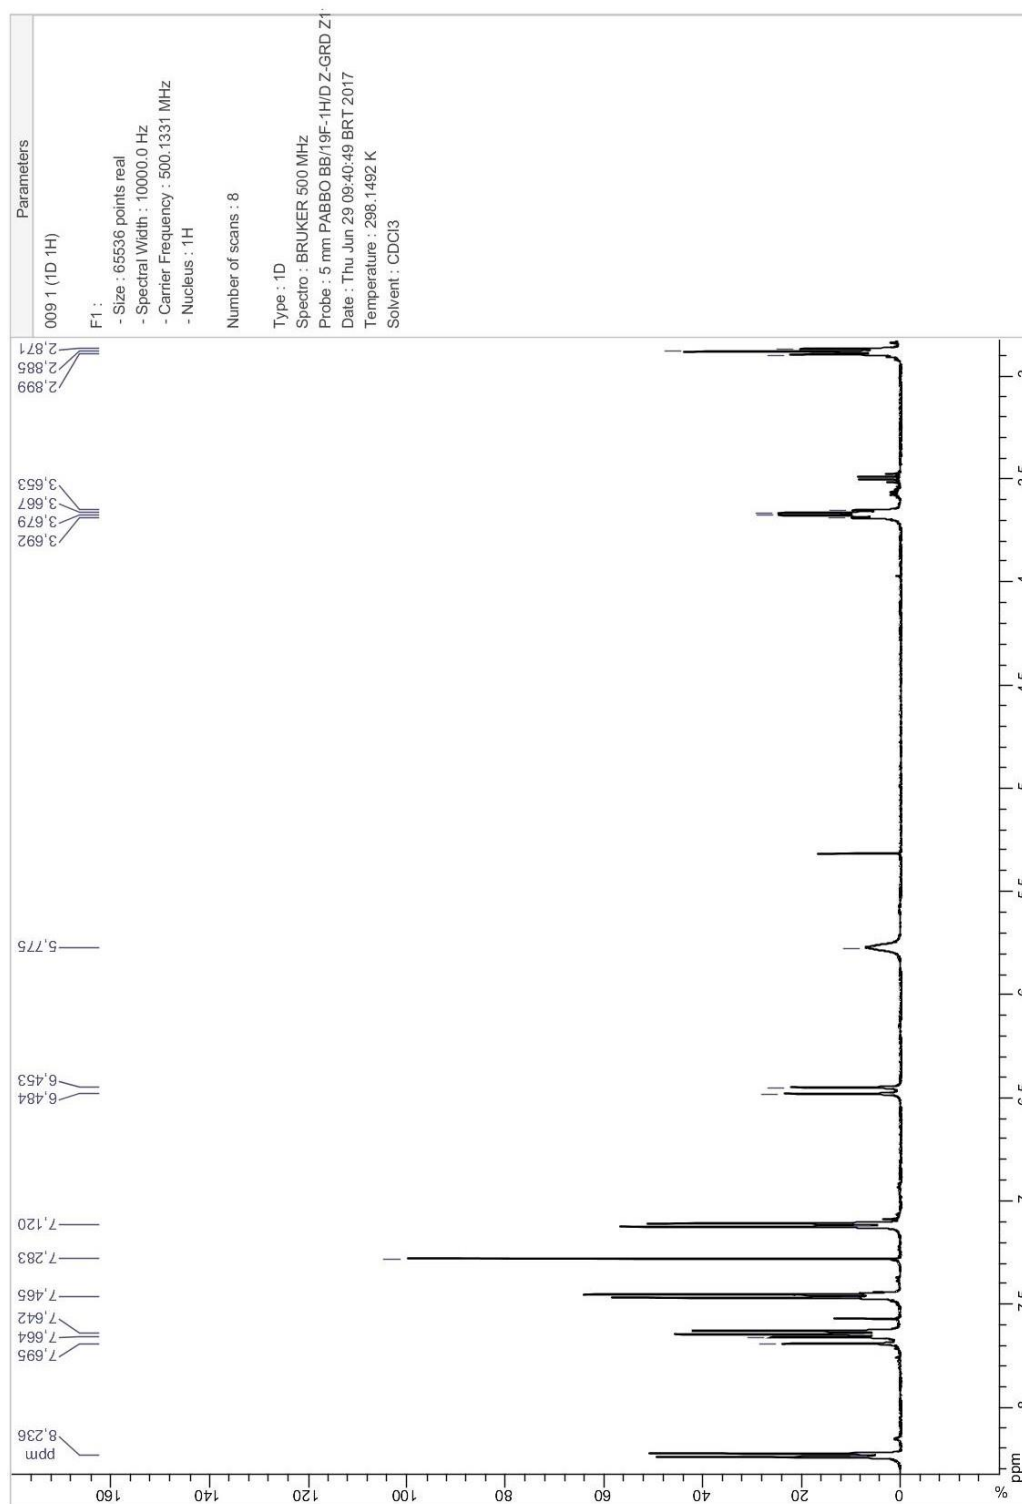

**Figure S31.**  $^1\text{H}$  NMR spectrum of compound 6 ( $\text{CDCl}_3$ , 500 MHz).



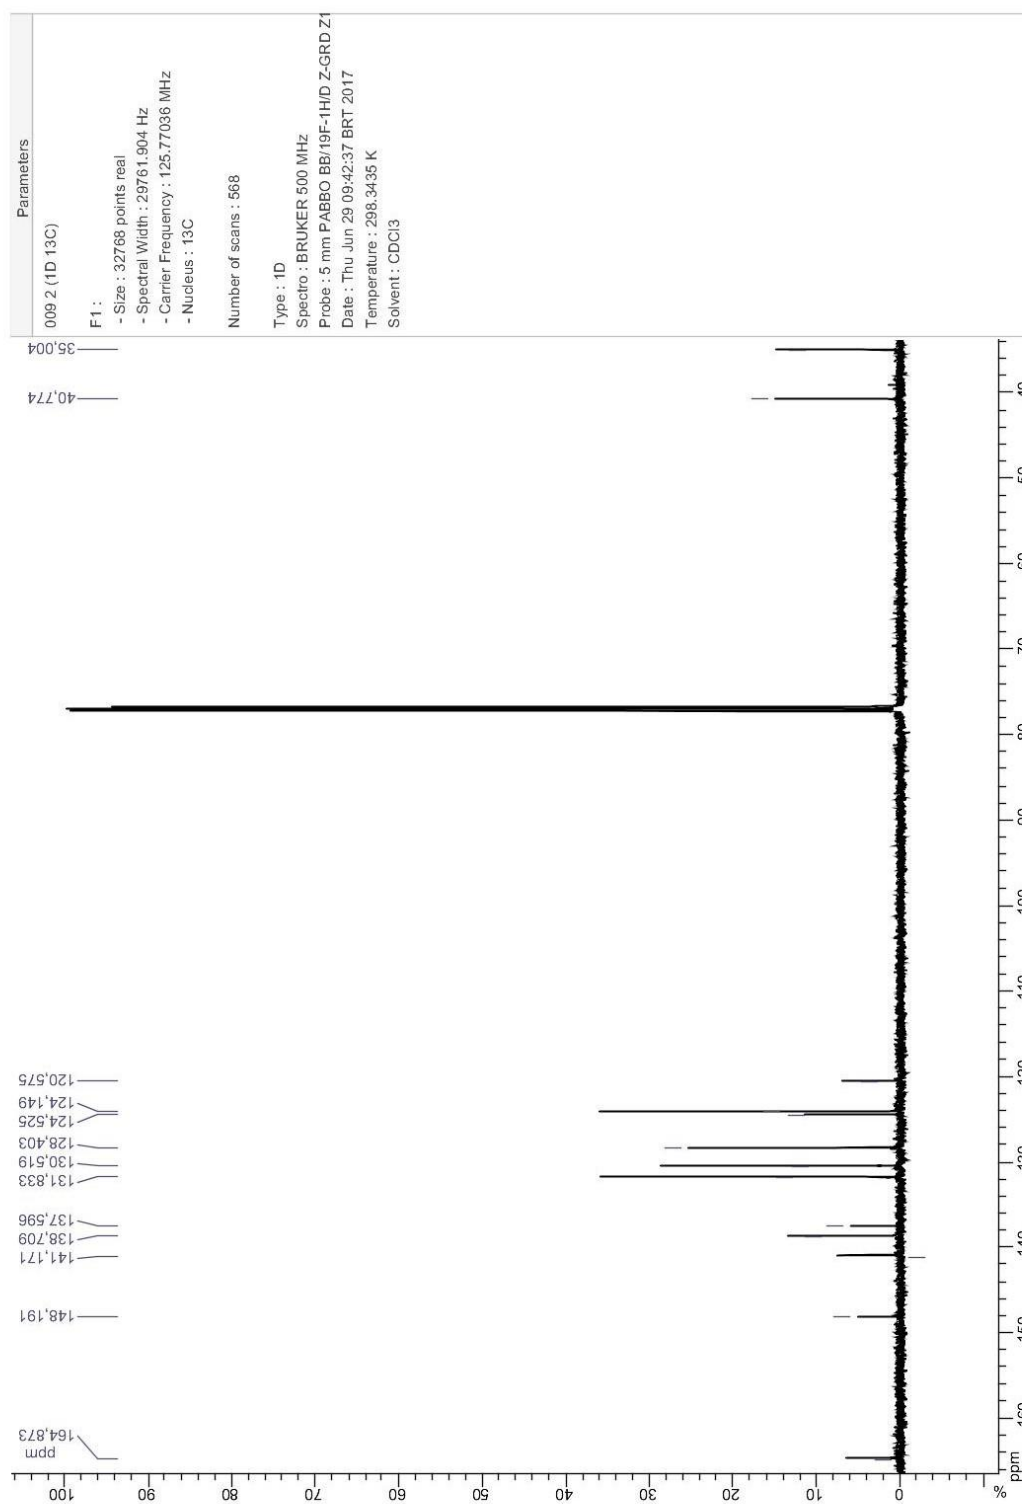

**Figure S32.**  $^{13}\text{C}$  NMR spectrum of compound 6 ( $\text{CDCl}_3$ , 125 MHz).

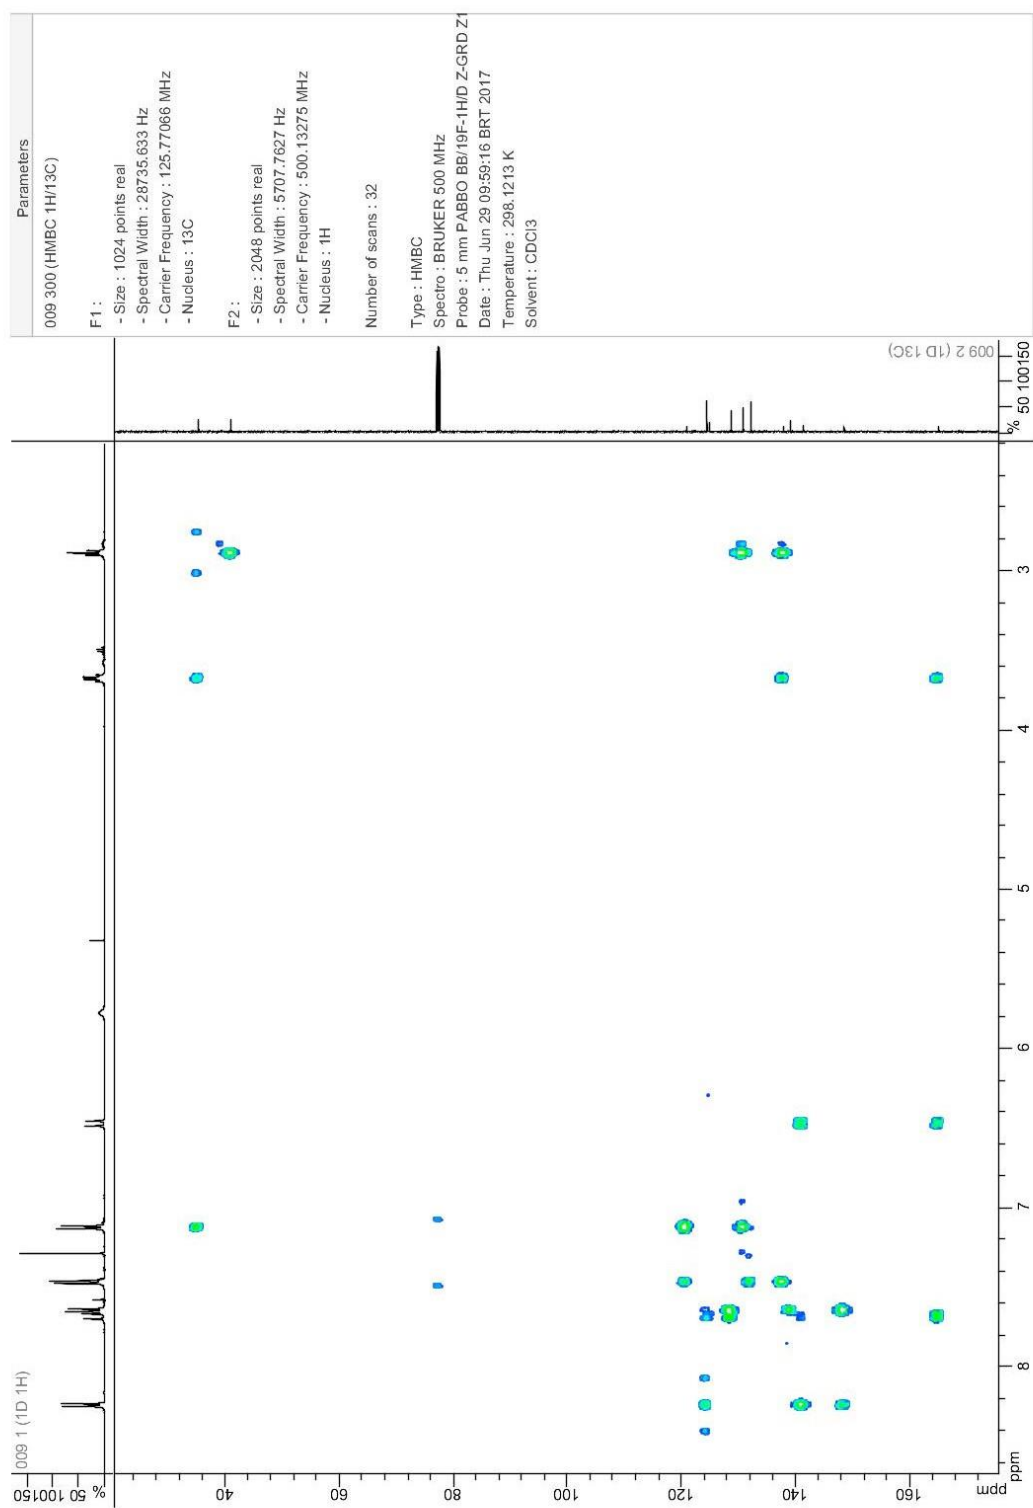

Figure S33. HMBC spectrum of compound **6** (CDCl<sub>3</sub>, 500 MHz).

006 HSQC.ESP

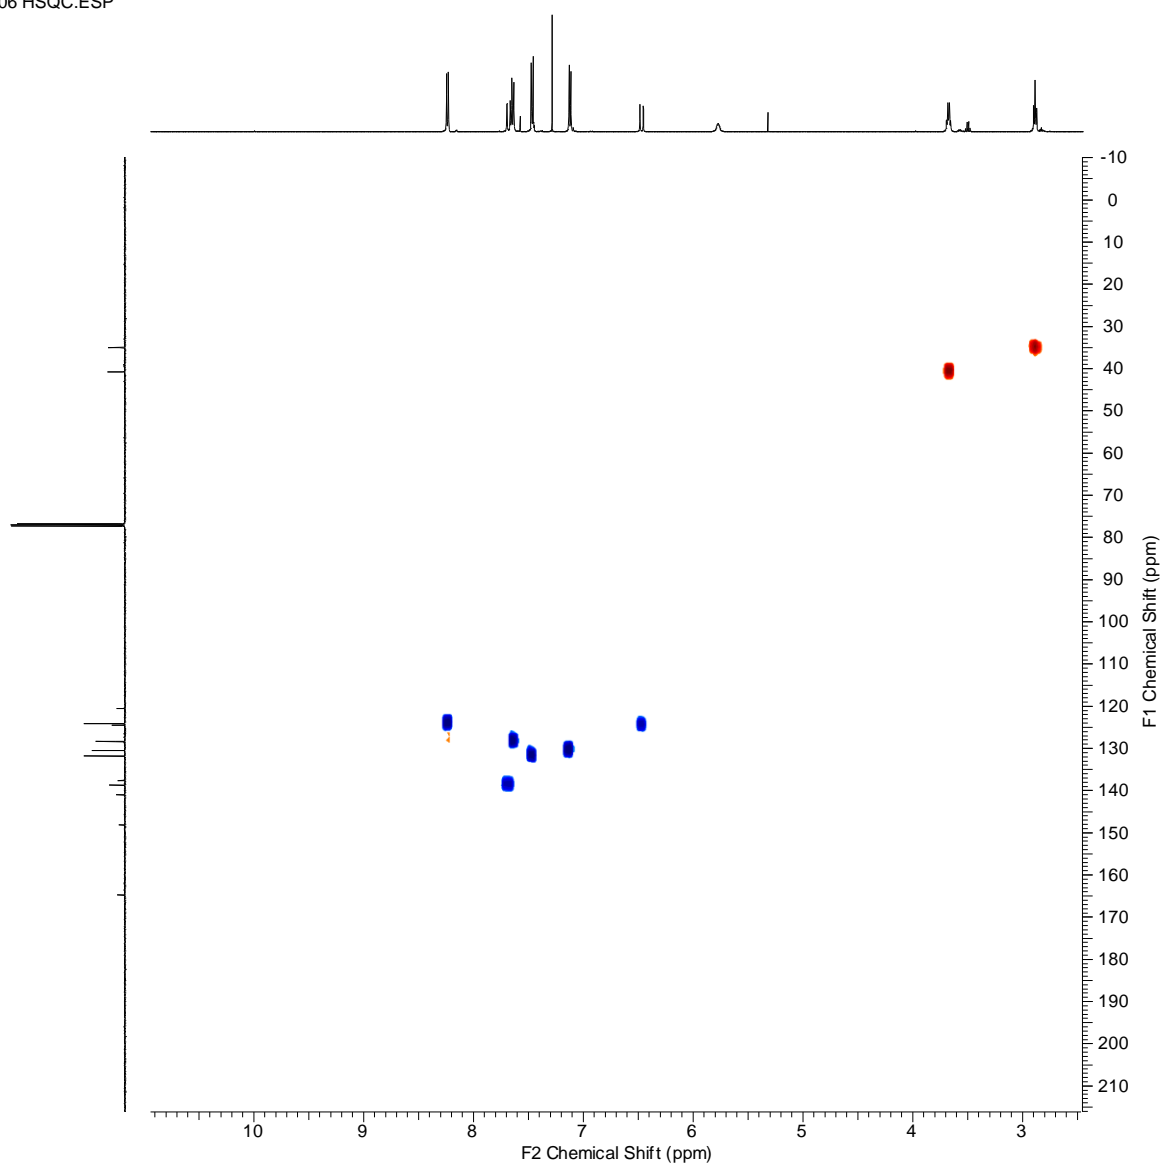

**Figure S34.** HSQC spectrum of compound **6** (CDCl<sub>3</sub>, 500 MHz).

Abundance

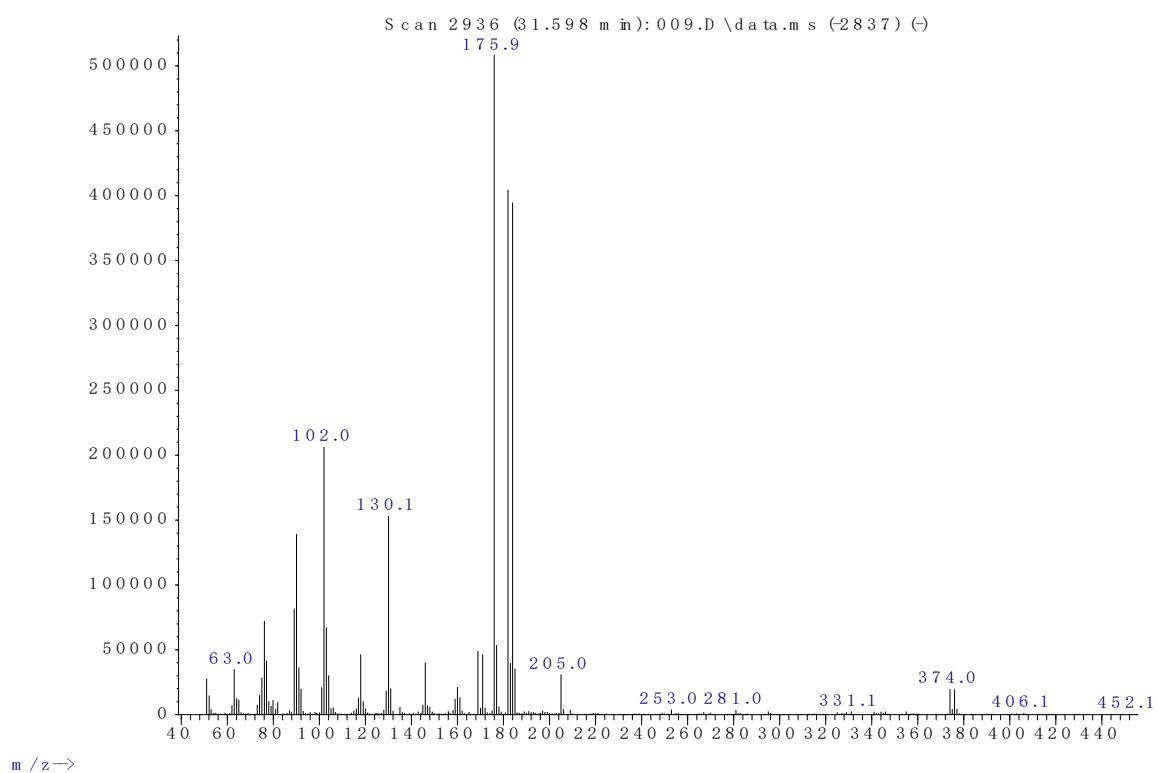**Figure S35.** Mass spectrum of compound 6 (CH<sub>2</sub>Cl<sub>2</sub>).

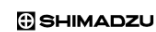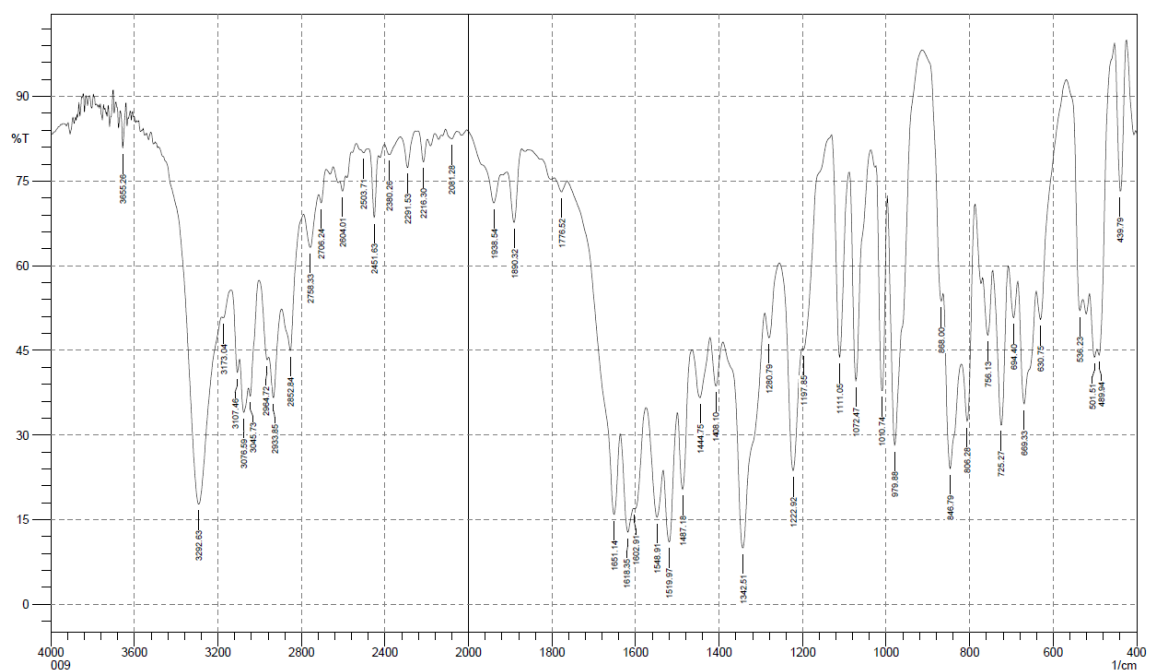

Figure S36. IR spectrum (KBr) of compound 6.

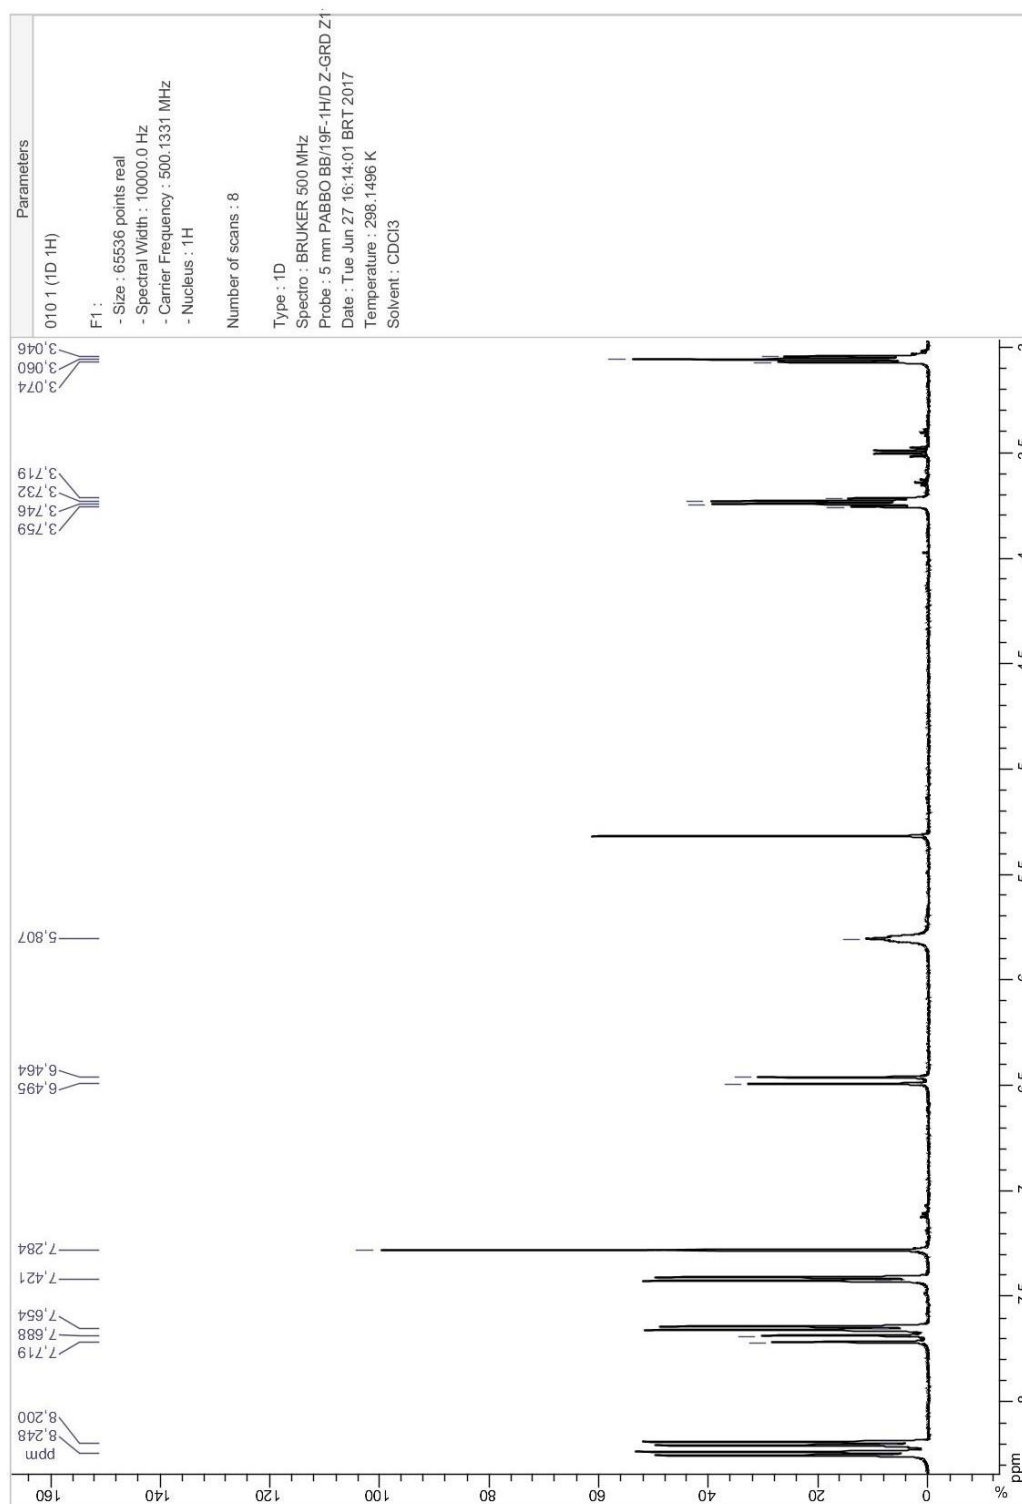

Figure S37.  $^1\text{H}$  NMR spectrum of compound 7 ( $\text{CDCl}_3$ , 500 MHz).

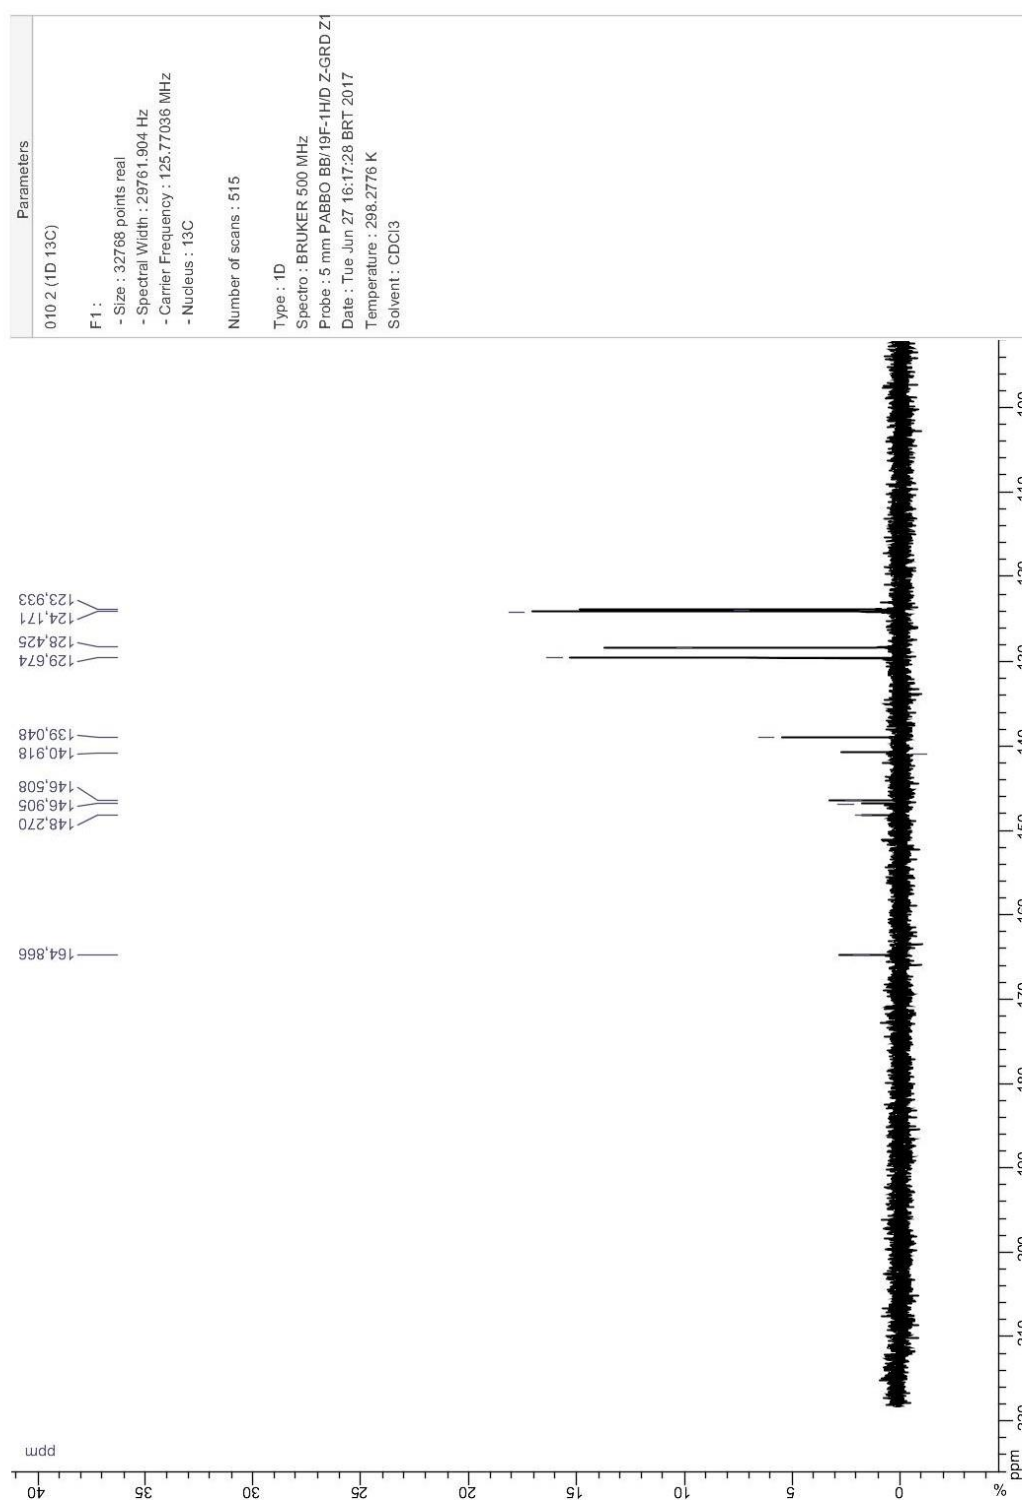

**Figure S38.**  $^{13}\text{C}$  NMR spectrum of compound 7 ( $\text{CDCl}_3$ , 125 MHz).

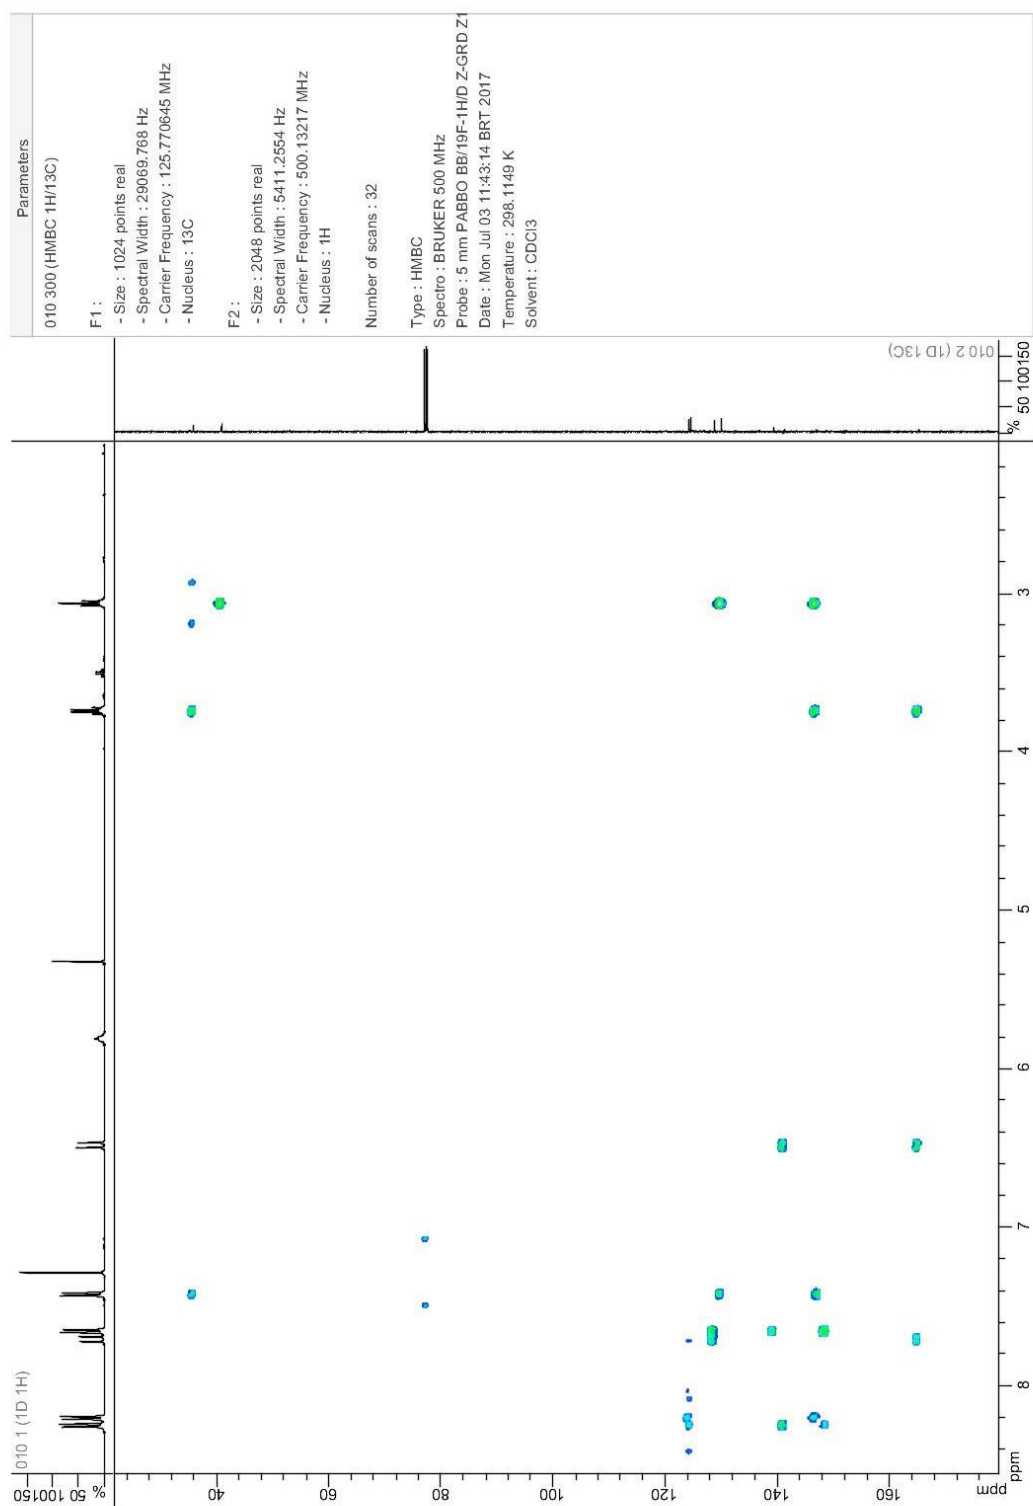

Figure S39. HMBC spectrum of compound 7 (CDCl<sub>3</sub>, 500 MHz).



007 HSQC.ESP

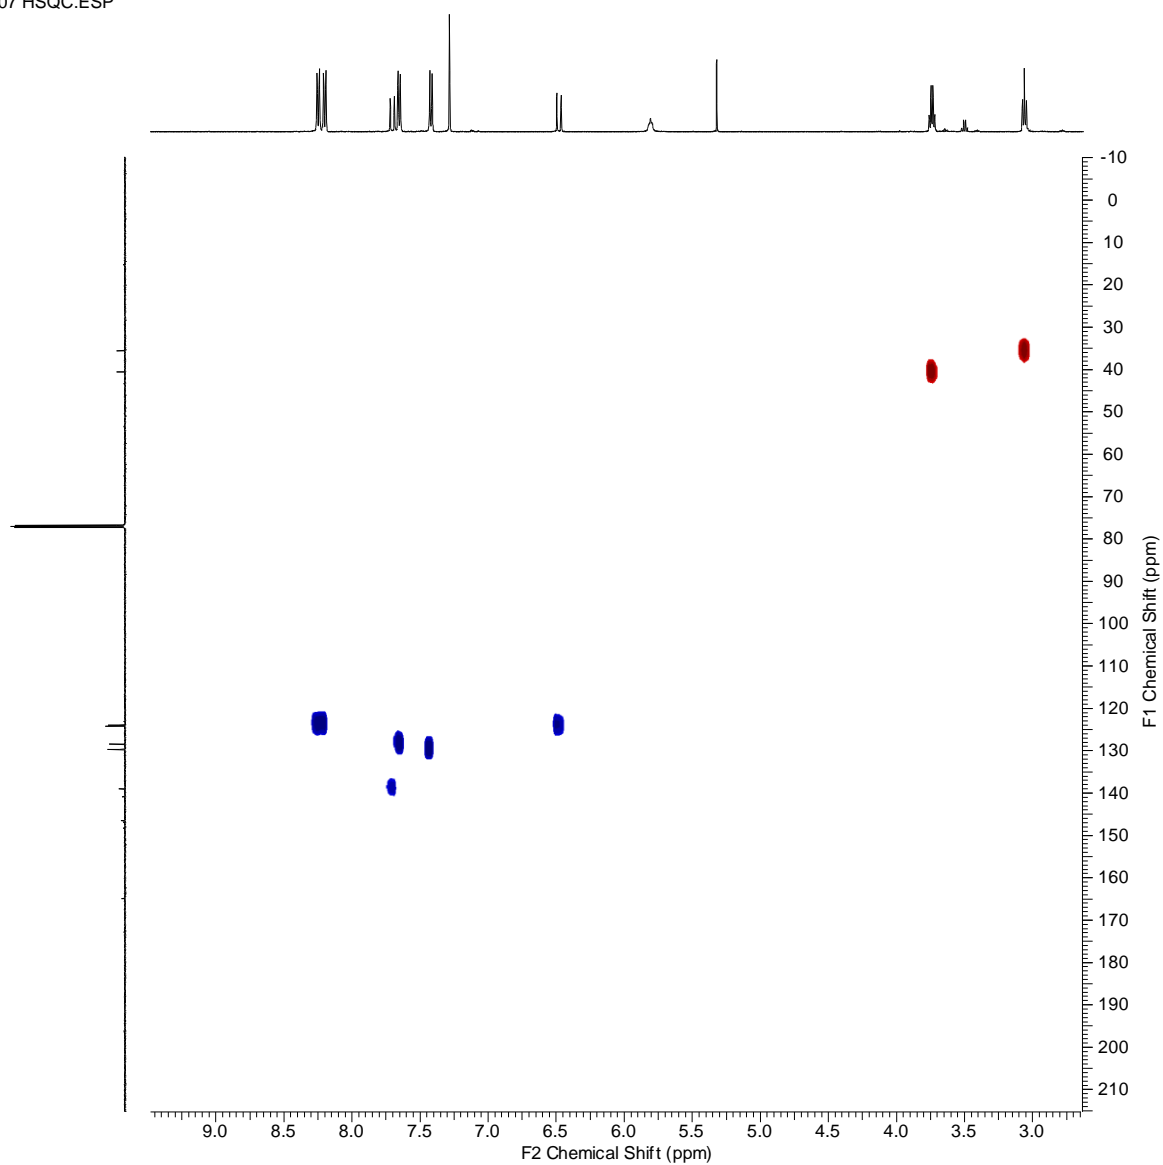

**Figure S40.** HSQC spectrum of compound 7 (CDCl<sub>3</sub>, 500 MHz).

Abundance

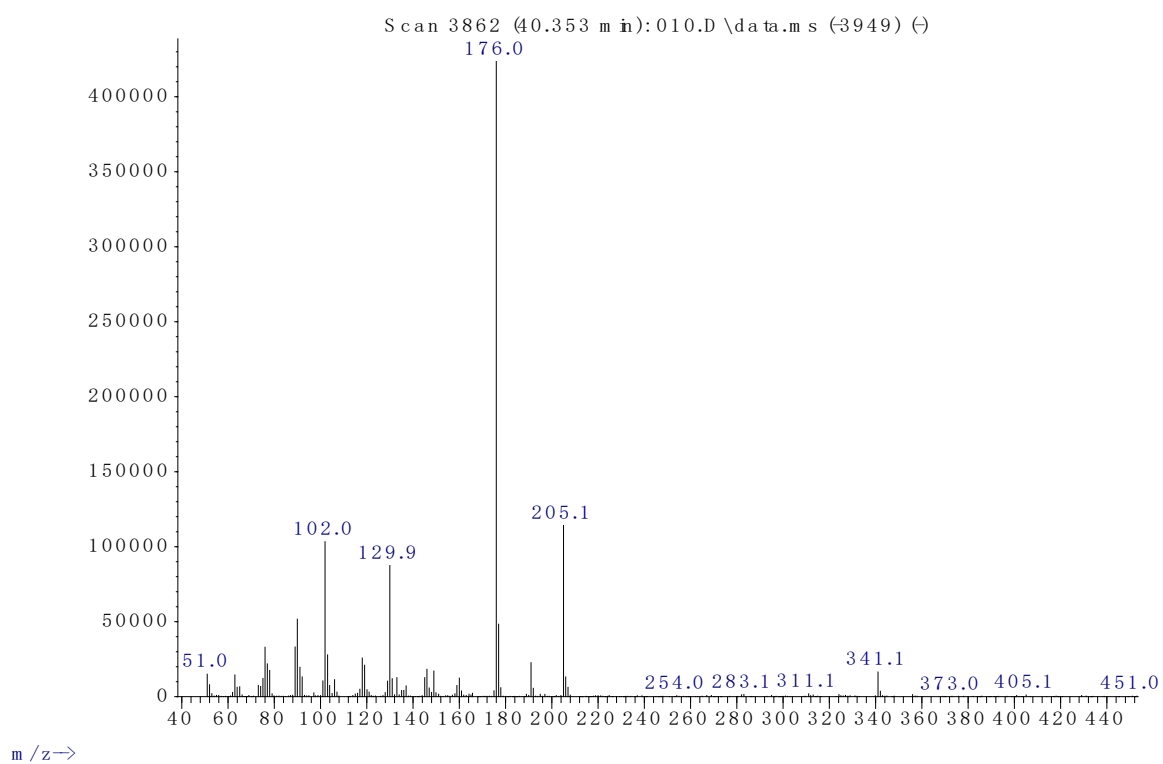**Figure S41.** Mass spectrum of compound 7 ( $\text{CH}_2\text{Cl}_2$ ).

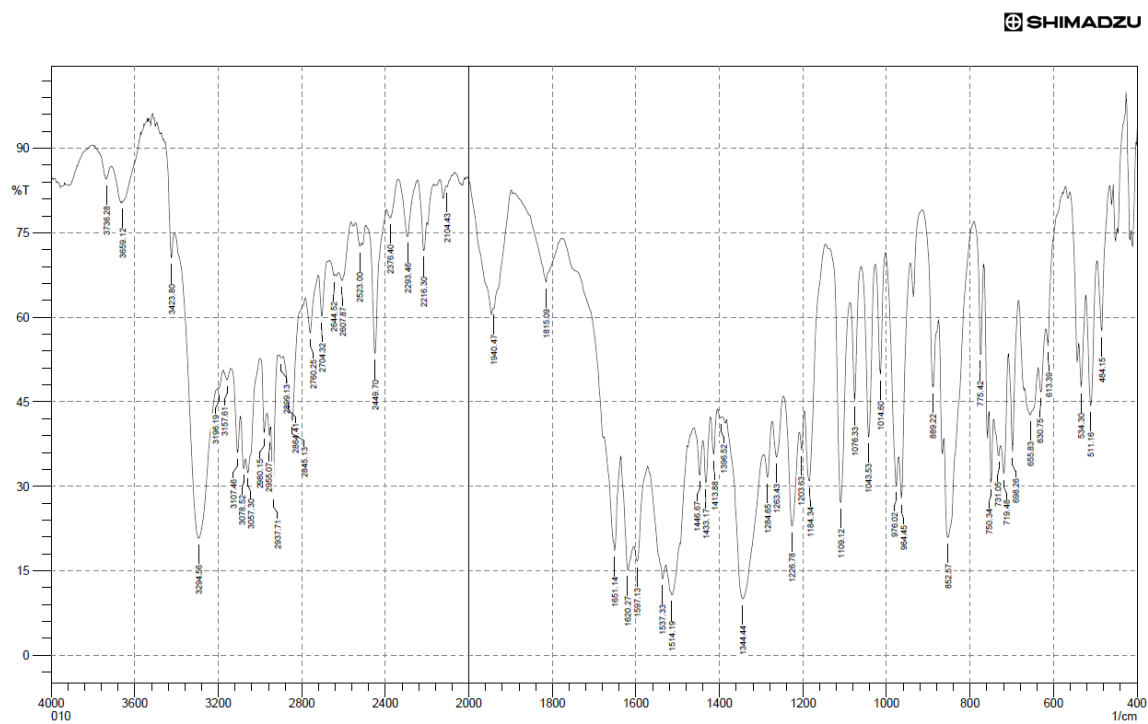

Figure S42. IR spectrum (KBr) of compound 7.

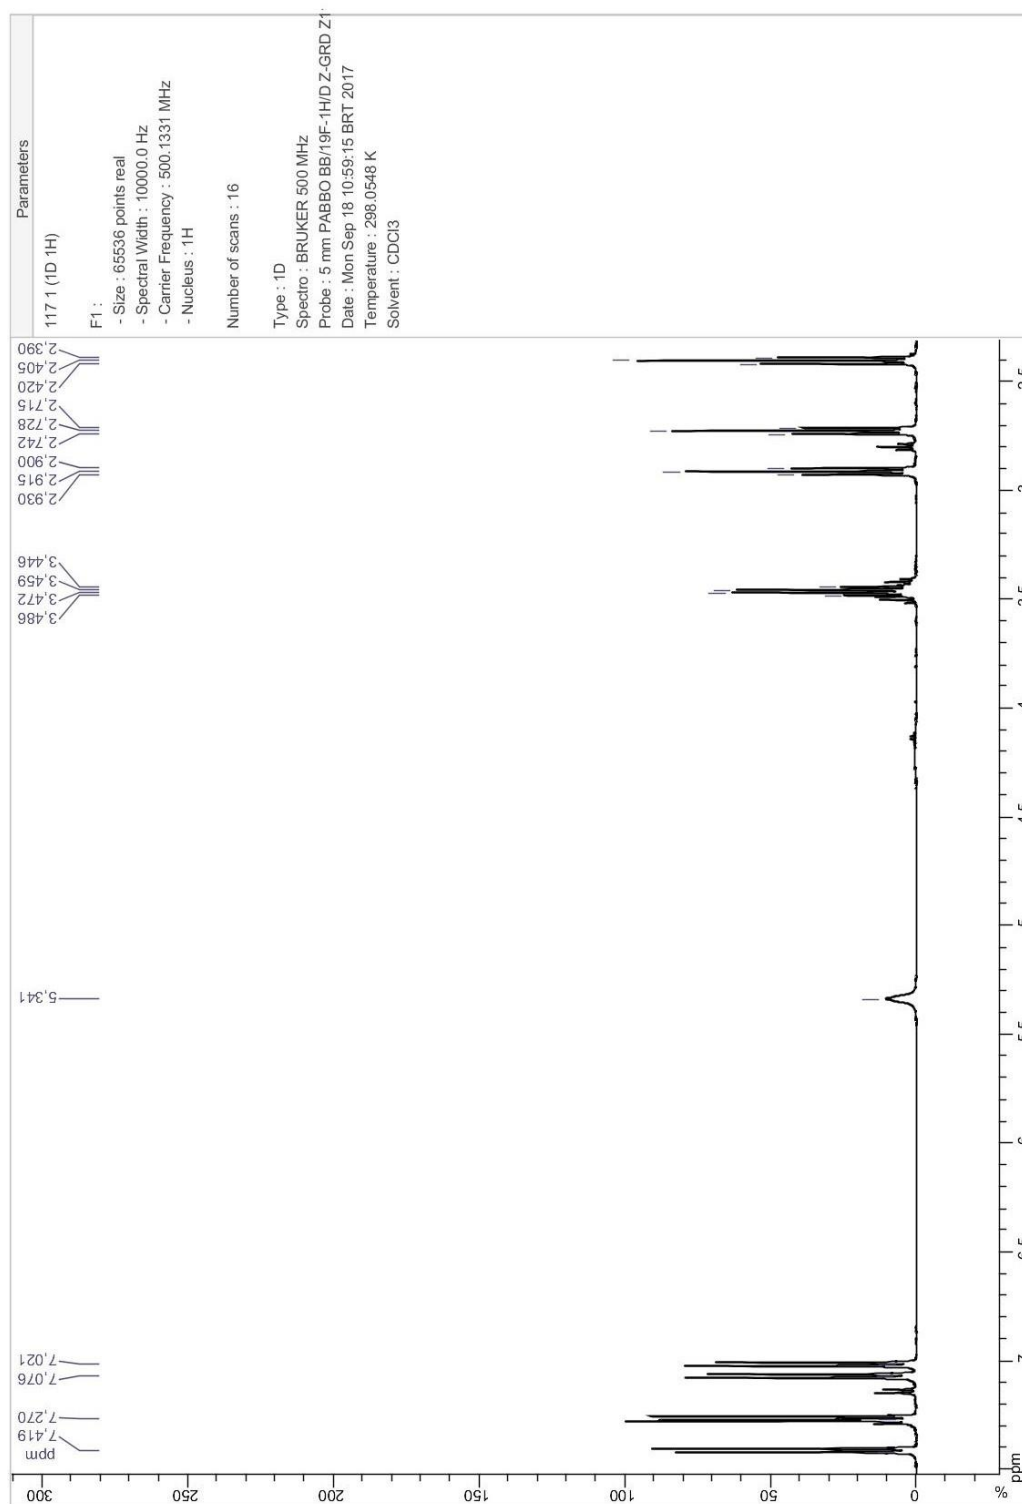

**Figure S43.** <sup>1</sup>H NMR spectrum of compound **8** (CDCl<sub>3</sub>, 500 MHz).

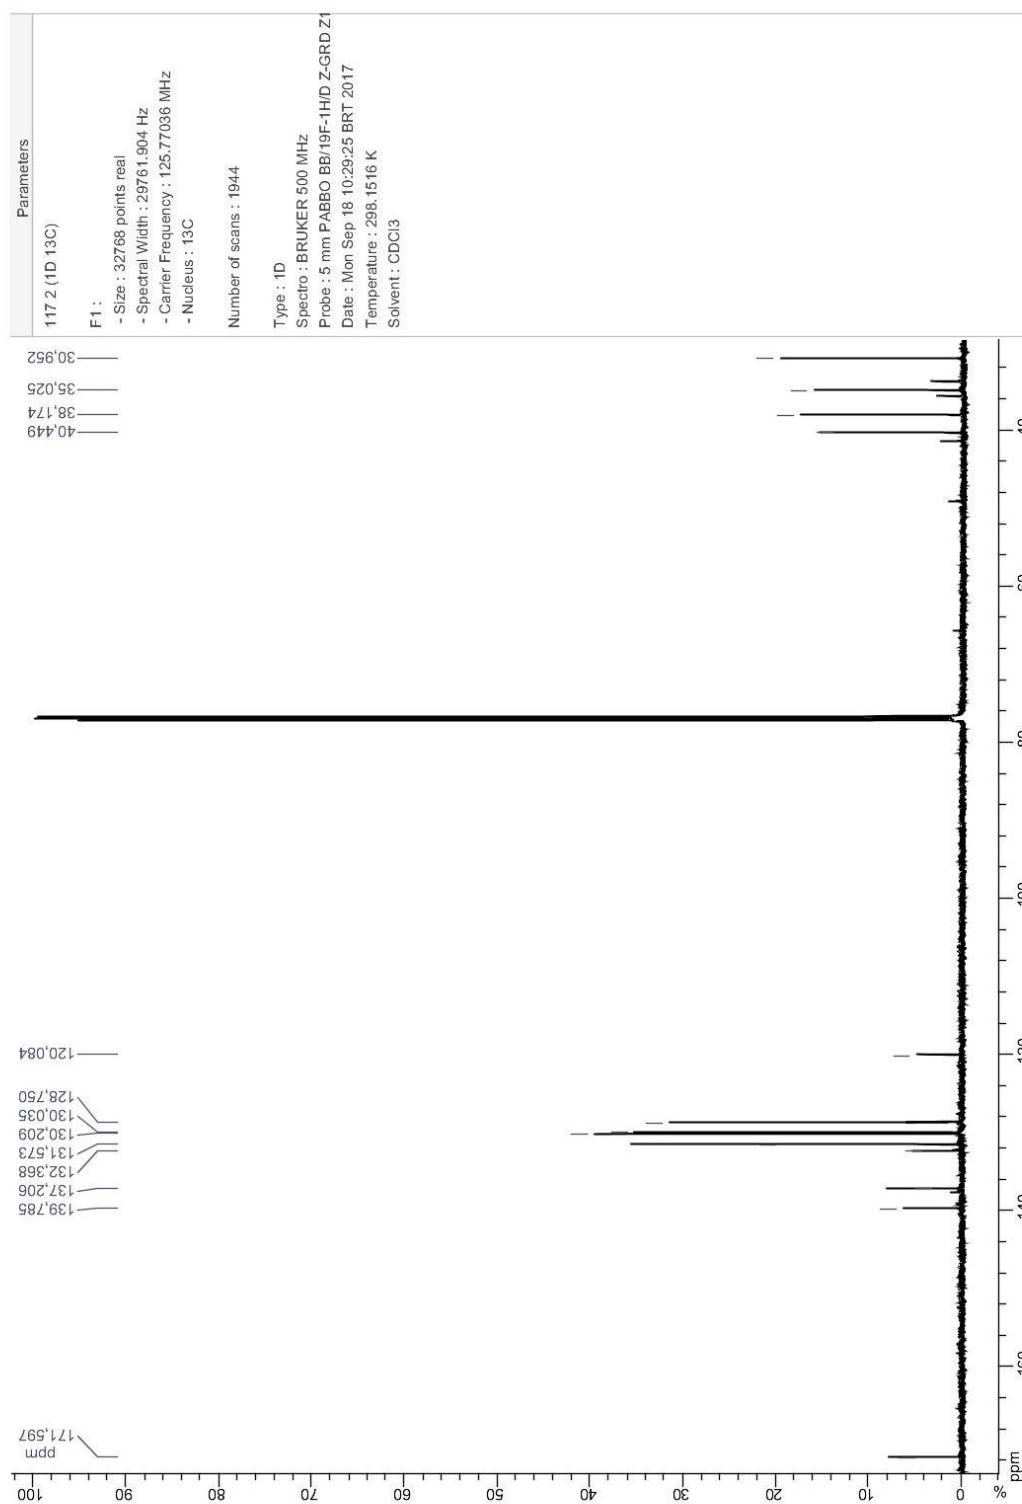

**Figure S44.**  $^{13}\text{C}$  NMR spectrum of compound **8** ( $\text{CDCl}_3$ , 125 MHz).

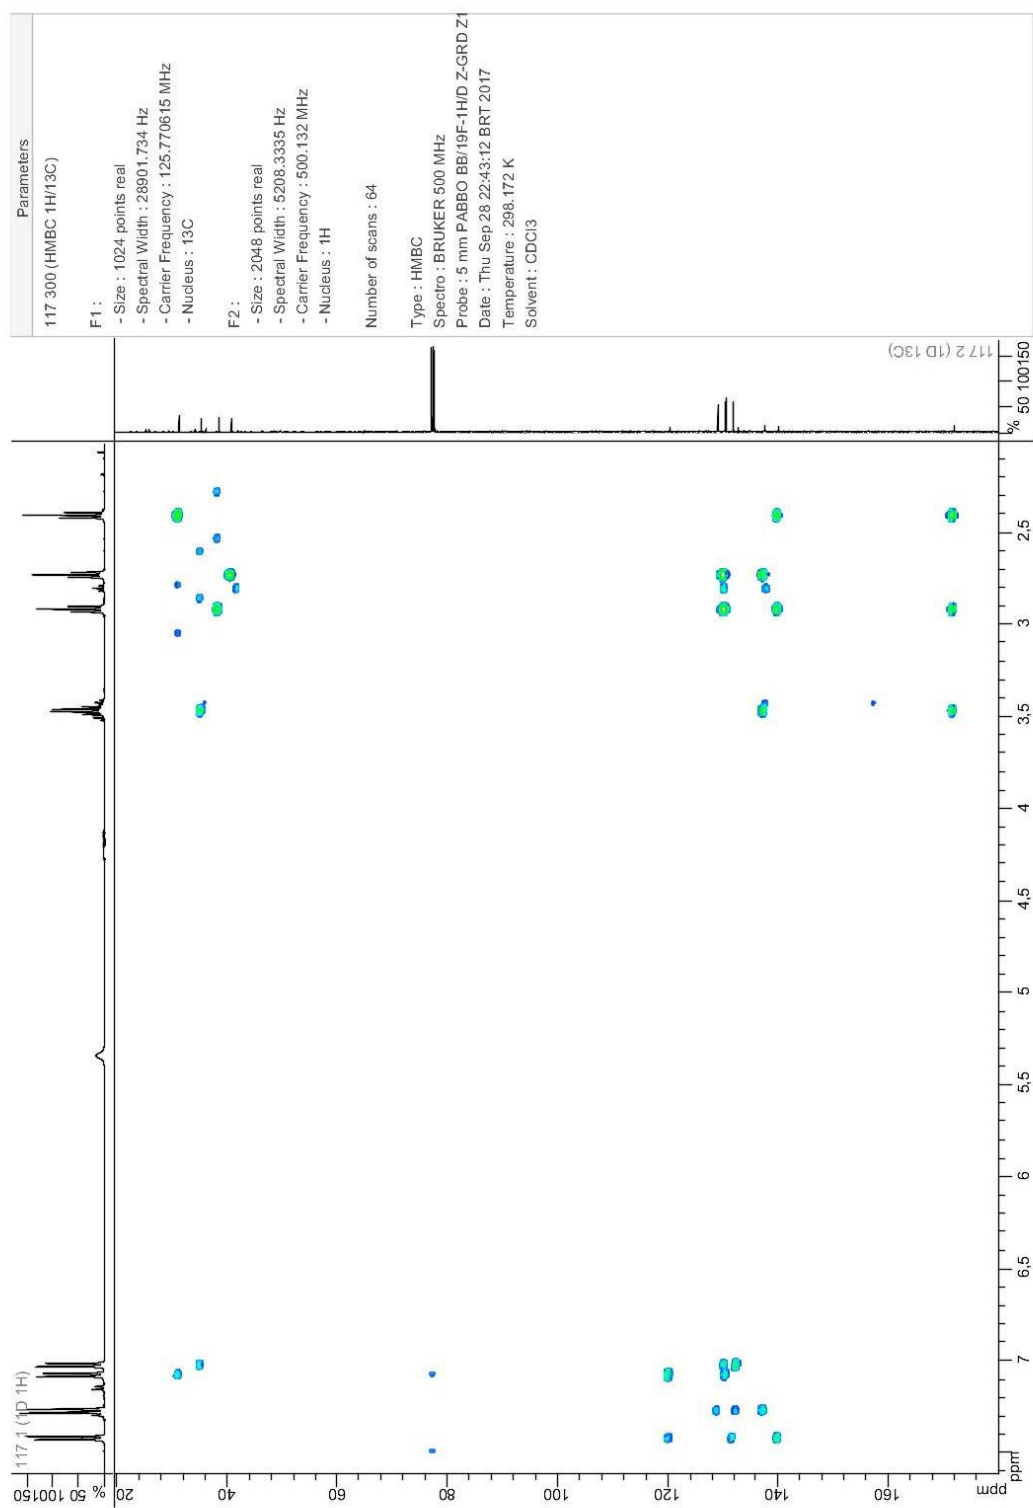

Figure S45. HMBC spectrum of compound **8** (CDCl<sub>3</sub>, 500 MHz).

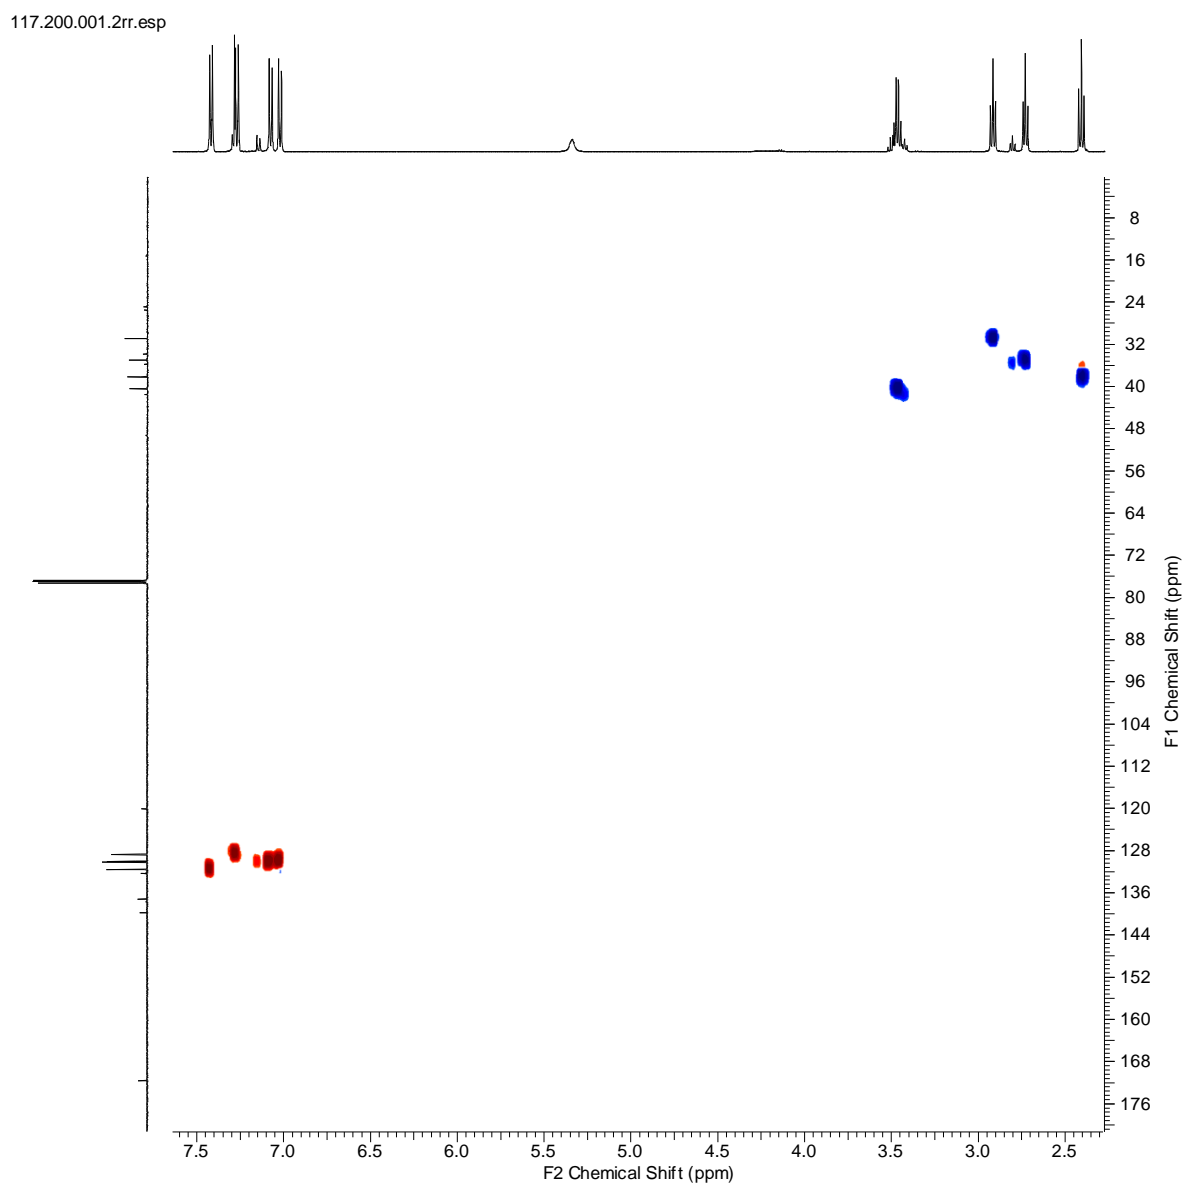

**Figure S46.** HSQC spectrum of compound **8** ( $\text{CDCl}_3$ , 500 MHz).

Abundance

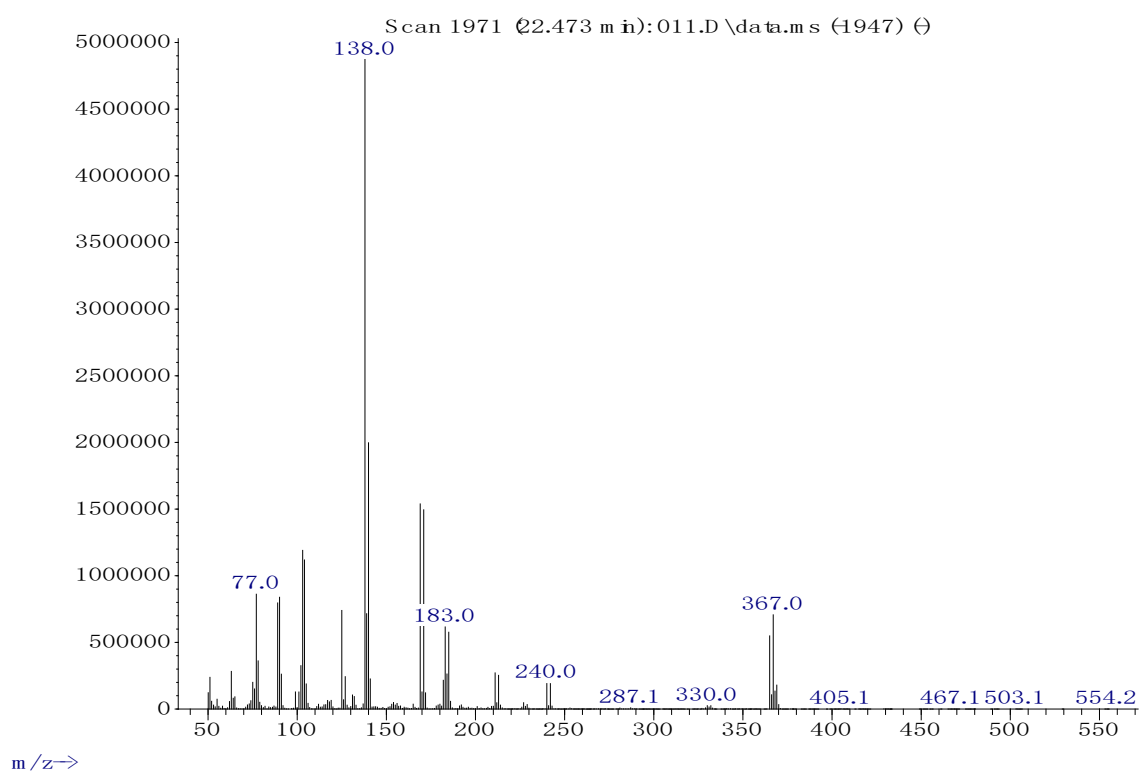

**Figure S47.** Mass spectrum of compound 8 ( $\text{CH}_2\text{Cl}_2$ ).



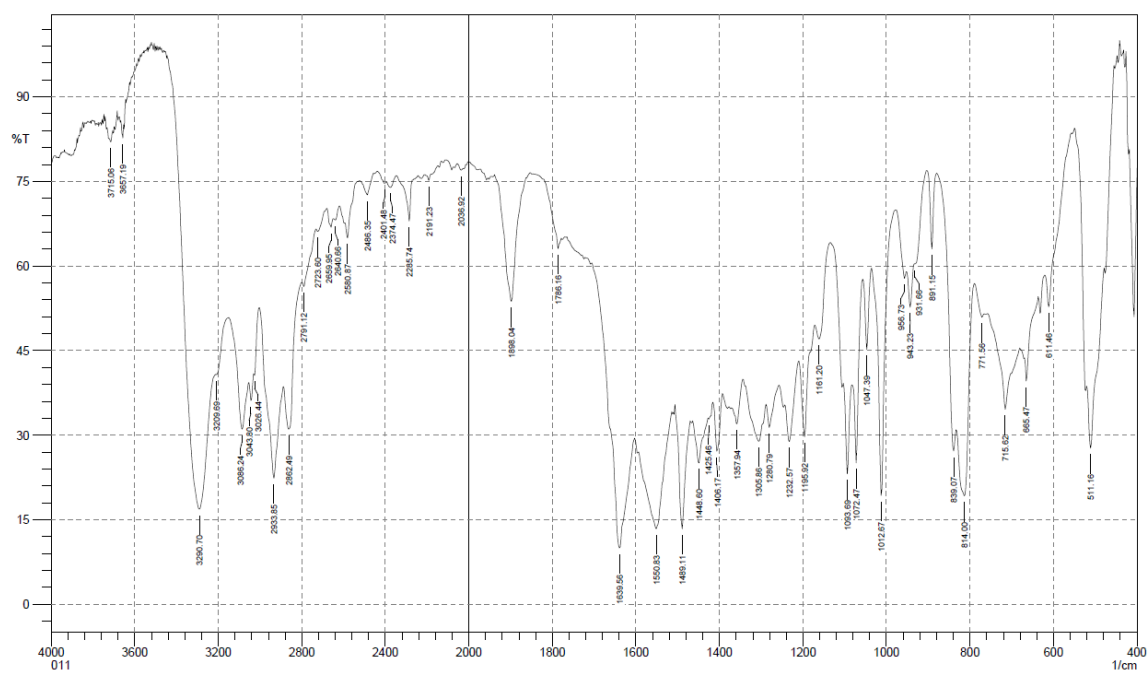

Figure S48. IR spectrum (KBr) of compound 8.
